1 **PLETHORA and WOX5 interaction and subnuclear localisation regulates *Arabidopsis***  
2 **root stem cell maintenance**

3

4 Rebecca C. Burkart<sup>1</sup>, Vivien I. Strotmann<sup>1</sup>, Gwendolyn K. Kirschner<sup>1,2</sup>, Abdullah Akinci<sup>1</sup>,  
5 Laura Czempik<sup>1,3</sup>, Alexis Maizel<sup>4</sup>, Stefanie Weidtkamp-Peters<sup>5</sup>, Yvonne Stahl<sup>1\*</sup>

6

7 <sup>1</sup>Institute for Developmental Genetics, Heinrich-Heine University, Universitätsstr. 1, 40225  
8 Düsseldorf, Germany

9 <sup>2</sup>present affiliation: Institute for Crop Science and Resource Conservation, Crop Functional  
10 Genomics, University of Bonn, Friedrich-Ebert-Allee 144, 53113 Bonn, Germany

11 <sup>3</sup>present affiliation: Molecular Plant Science/Plant Biochemistry, University of Wuppertal,  
12 Gaußstraße 20, 42119 Wuppertal, Germany

13 <sup>4</sup>Center for Organismal Studies (COS), University of Heidelberg, Im Neuenheimer Feld 230,  
14 69120 Heidelberg, Germany

15 <sup>5</sup>Center for Advanced Imaging, Heinrich-Heine University, Universitätsstr. 1, 40225  
16 Düsseldorf, Germany

17 \*Correspondence should be addressed to Y.S. (E-mail [Yvonne.Stahl@hhu.de](mailto:Yvonne.Stahl@hhu.de))

18 Key words: stem cells, root meristem, differentiation, transcription factor complexes, nuclear  
19 bodies, prion-like domains

20 **Total word count: 7260**

21 **Abstract**

22 Maintenance and homeostasis of the stem cell niche (SCN) in the *Arabidopsis* root is essential  
23 for growth and development of all root cell types. The SCN is organized around a quiescent  
24 center (QC) that maintains the stemness of the cells in direct contact. The transcription factors  
25 WUSCHEL-RELATED HOMEODOMAIN 5 (WOX5) and the PLETHORAs (PLTs) are both  
26 expressed in the SCN where they maintain the QC and regulate the fate of the distal columella  
27 stem cells (CSCs). Although WOX5 and PLTs are known as important players in SCN  
28 maintenance, much of the necessary regulation of quiescence and division in the *Arabidopsis*  
29 root is not understood on a molecular level. Here, we describe the concerted mutual regulation  
30 of the key transcription factors WOX5 and PLTs on a transcriptional and protein interaction  
31 level, leading to a confinement of the WOX5 expression domain to the QC cells by negative  
32 feedback regulation. Additionally, by applying a novel SCN staining method, we demonstrate  
33 that both WOX5 and PLTs are necessary for root meristem maintenance as they regulate QC  
34 quiescence and CSC fate and show that QC divisions and CSC differentiation correlate.  
35 Moreover, we uncover that PLTs, especially PLT3, contains intrinsically disordered prion-like  
36 domains (PrDs) that are necessary for complex formation with WOX5 and its recruitment to  
37 subnuclear microdomains/nuclear bodies (NBs) in the CSCs. We propose that the partitioning  
38 of the PLT-WOX5 complexes to NBs, possibly by liquid-liquid phase separation, plays an  
39 important role during determination of CSC fate.

## 40 **Introduction**

41 The root system of higher plants is essential for plant life, as it provides anchorage in the soil  
42 and access to nutrients and water. It arises from a population of long-lasting stem cells residing  
43 in a structure called root apical meristem (RAM) at the tip of the root. Within the *Arabidopsis*  
44 *thaliana* RAM, the stem cell niche (SCN) consists of on average four slowly dividing cells, the  
45 QC cells, which act as a long-term reservoir and signalling center by maintaining the  
46 surrounding shorter-lived, proliferating stem cells (also called initials) in a non-cell autonomous  
47 manner<sup>1</sup>. These stem cells continuously divide asymmetrically, thereby generating new stem  
48 cells that are still in contact with the QC. The hereby-produced daughter cells frequently  
49 undergo cell divisions and are shifted further away from the QC to finally differentiate. By this  
50 mechanism, the position of the stem cells in the root remains the same throughout development  
51 and their precise orientation of division leads to the formation of concentrically organized  
52 clonal cell lineages representing a spatio-temporal developmental gradient<sup>1-3</sup>. From the inside  
53 to the outside the following root cell layers develop: vasculature, pericycle, endodermis, cortex  
54 and epidermis plus columella and lateral root cap at the distal root tip (Fig. 1a).

55 The necessary longevity and continuous activity of the RAM can only be achieved if its stem  
56 cell pool is constantly replenished, since cells are frequently leaving the meristematic region  
57 due to continuous cell divisions. Therefore, complex regulatory mechanisms involving  
58 phytohormones and key transcription factors (TFs) regulate stem cell maintenance and the  
59 necessary supply of differentiating descendants<sup>4</sup>. Here, the APETALA2-type PLT TF family  
60 and the homeodomain TF WOX5 play important roles<sup>5,6</sup>. WOX5 is expressed mainly in the  
61 QC, but maintains the surrounding stem cells non-cell-autonomously by repressing their  
62 differentiation<sup>6,7</sup>. Loss of WOX5 causes the differentiation of the distal CSCs into starch-  
63 accumulating columella cells (CCs), while increased WOX5 expression causes CSC over-  
64 proliferation. Hence, WOX5 abundance is critical and necessary to suppress premature CSC

65 differentiation<sup>6,7</sup>. WOX5 also represses QC divisions, maintaining the quiescence of the QC by  
66 repressing CYCLIN D (CYCD) activity within the QC<sup>8</sup>. The auxin-induced PLTs form a clade  
67 of six TFs, and act as master regulators of root development, as multiple *plt* mutants fail to  
68 develop functional RAMs<sup>5,9,10</sup>. PLT1, 2, 3 and 4 are expressed mainly in and around the QC  
69 and form an instructive gradient, which is required for maintaining the balance of stem cell fate  
70 and differentiation. This PLT gradient is also necessary for separating auxin responses in the  
71 SCN and for the correct positioning of the QC and the expression of QC markers<sup>5,9,10</sup>.  
72 Genetically, WOX5 and PLT1 were shown to play an interconnected role in auxin-regulated  
73 CSC fate, whereas PLT1 and PLT3 were found to positively regulate WOX5 expression<sup>11,12</sup>.  
74 Although the implication of PLTs and WOX5 in controlling stem cell regulation and  
75 maintenance in the *Arabidopsis* RAM is well established and genetic evidence for cross  
76 regulation exists, the underlying molecular mechanisms remain largely elusive. Here, we show  
77 that the mutual regulation of expression, but also the ability of PLTs, especially PLT3, to recruit  
78 WOX5 to NBs in CSCs controls stem cell homeostasis in the *Arabidopsis* RAM. We propose  
79 a model in which the differential PLT/WOX5 complexes depending on subnuclear localisation  
80 regulate stem cell fate in the RAM, possibly by phase separation of PLT3 to NBs.

## 81 **Results**

82 WOX5 and PLTs are essential players in distal stem cell maintenance<sup>5-7,9</sup>. This, as well as their  
83 overlapping expression and protein localisation domains in the root SCN raised the question if  
84 they could act together in distal stem cell regulation, where, in comparison to all the other PLTs,  
85 particularly PLT3 is highly expressed (Fig. 1b)<sup>9</sup>. First, we tested if WOX5 influences *PLT3*-  
86 expression. Both a transcriptional and translational *PLT3* fluorescent reporter line showed a  
87 reduced expression in the QC and CSC of a *wox5* mutant to around 60 % compared to the *Col*-  
88 *0* wild type roots (Fig. 1b-g, Suppl. Table 5). This extends the previously reported regulation  
89 of *PTL1* expression by WOX5<sup>11</sup> and shows that WOX5 positively regulates expression of  
90 several *PLTs*. To test if *WOX5* expression also depends on PLTs, we used a transcriptional  
91 reporter, which expresses a nuclear-localised mVenus from the *WOX5* promoter. In agreement  
92 with previous reports, expression of *WOX5* in our transcriptional reporter line is confined to the  
93 QC and is only weakly expressed in the stele initials<sup>6,7</sup> (Fig. 2a). In *plt2* and *plt3* single mutants,  
94 we observed additional mVenus-expressing cells in the QC region, which may derive from  
95 aberrant periclinal cell divisions in the QC (Fig. 2b,c, Suppl. Table 6). This effect is even  
96 stronger in the *plt2, plt3* double mutant roots, where extra cells are found in all observed roots  
97 and often even form an additional cell layer of *WOX5* expressing cells (Fig. 2d). We quantified  
98 the number of *WOX5* expressing cells and the area of *WOX5* expression per root by acquiring  
99 transverse optical sections through the roots. Previously, it was reported that the *Arabidopsis*  
100 wild type QC is composed of three to five cells with a low division rate<sup>2,13-15</sup>. Applying our  
101 method, we observed four to nine *WOX5* expressing cells in the *Col-0* wild type (Fig. 2e,g,  
102 Suppl. Table 6), whereas we found nine to 14 *WOX5* expressing cells and a laterally expanded  
103 *WOX5* expression domain in the *plt2, plt3* double mutants (Fig. 2f,g,h, Suppl. Table 6). Taken  
104 together, our data show that WOX5 positively regulates *PLT3* expression, whereas PLT2 and

105 PLT3 synergistically restrict *WOX5* to its defined expression domain in the QC, possibly by  
106 negative feedback regulation.

107 QC cells rarely divide as they provide a long-term reservoir to maintain the surrounding stem  
108 cells<sup>13,16</sup>. As *WOX5* and PLTs control QC cell divisions and CSC maintenance<sup>5-10</sup>, we asked if  
109 these two aspects are interdependent. Therefore, we analysed the cell division rates in the QC  
110 and the CSC phenotypes in wild type and mutant roots. To assess these two phenotypes and to  
111 probe for their interdependency, we had to measure the number of dividing QC cells and CSC  
112 layers within the same root simultaneously. Therefore, we established a novel staining method,  
113 named SCN staining, by combining the 5-ethynyl-2'-deoxyuridine (EdU) and modified pseudo  
114 Schiff base propidium iodide (mPS-PI) stainings to simultaneously visualise cell divisions,  
115 starch granule distribution and cell walls within the same root<sup>13,17</sup>. Applying this new staining  
116 combination, potential correlations between QC-divisions and CSC cell fates can be uncovered.  
117 The EdU-staining provides a useful method to analyse QC-divisions by staining nuclei that  
118 have gone through the S-phase, detecting cells directly before, during and after cell division<sup>13</sup>.  
119 However, cell layers and different cell types are hard to distinguish using only EdU staining  
120 due to the lack of cell wall staining. Therefore, we used the mPS-PI-method to stain cell walls  
121 and starch which is commonly used for CC and CSC cell fate characterisation<sup>17-19</sup>. CCs are  
122 differentiated, starch granule-containing cells in the distal part of the root and mediate gravity  
123 perception. They derive from the CSCs that form one or, directly after cell division, two cell  
124 layers distal to the QC. The CSCs lack big starch granules and can thereby easily be  
125 distinguished from the differentiated CCs by mPS-PI staining<sup>17-19</sup> (see Fig. 3a,b,i, raw data see  
126 Suppl. Table 11).

127 *WOX5* is necessary for CSC maintenance as loss of *WOX5* causes their differentiation<sup>6</sup>. In  
128 agreement with this, we found that the *wox5* mutants lack a starch-free cell layer in 78 % of  
129 analysed roots, indicating differentiation of the CSCs, compared to 17% in *Col-0* (Fig. 3a,b,f,i,

130 Suppl. Table 7). In the *plt2* and *plt3* single mutants, the frequency of roots lacking a CSC layer  
131 increases to above 30 % (36 % and 32 %, respectively), and in the *plt2, plt3* double mutant to  
132 41% (see Fig. 3c,d,e,i, Suppl. Table 7). Interestingly, the *wox5, plt3* double mutant as well as  
133 the *wox5, plt2, plt3* triple mutant show a frequency of differentiated CSCs comparable to the  
134 *wox5* single mutant (71 % and 77 %, respectively) (Fig. 3g,h,i, Suppl. Table 7). This data  
135 suggests that PLTs and WOX5 may act together in the same pathway to maintain CSC  
136 homeostasis, as there is no additive effect observable in the multiple mutant roots. To analyse  
137 QC division phenotypes in detail, we quantified the number of EdU-stained cells in QC position  
138 in transversal optical sections. In *Col-0*, 27 % of the analysed roots show at least one cell  
139 division in the QC within 24 hours (Fig. 3j,k,r, Suppl. Table 7), which is consistent with already  
140 published frequencies<sup>13</sup>. This frequency almost doubles to 45-50 % in the *plt2* and *plt3* single  
141 mutants and is even higher in the *plt2, plt3* double mutant (57 %) (Fig. 3l-n,r, Suppl. Table 7).  
142 Additionally, the *plt*-double mutant roots often show disordered QC regions with a disruption  
143 of the circular arrangement of cells surrounding the QC (Fig. 3n) which could be a result of  
144 uncontrolled divisions. In general, *wox5* mutants show a disordered SCN accompanied by a  
145 high overall QC cell division frequency of at least one dividing QC cell in 92 % of roots (Fig.  
146 3o,r) and on average more dividing QC cells per root (Suppl. Table 7). The number of dividing  
147 QC cells per root increases further in the *wox5, plt3* double mutant and is even higher in the  
148 *wox5, plt2, plt3* triple mutant; here, in one third of the roots all QC cells undergo cell division  
149 (Fig. 3p-r, Suppl. Table 7). Taken together, this data suggest an additive effect of PLT2, PLT3  
150 and WOX5 regarding the QC-division phenotype, in line with our hypothesis that WOX5 and  
151 PLTs act in parallel pathways to maintain the quiescence of the QC.

152 Additionally, we quantified roots showing at least one aberrant periclinal cell division in the  
153 QC in longitudinal optical sections (Suppl. Fig. 2). Whereas the occurrence of these aberrant  
154 periclinal divisions in *Col-0* wild type roots is very rare (3 %), it increases in the *plt*-single

155 mutants to 21 % and in *wox5* and *wox5, plt3* mutants to around 40 %. We found the most severe  
156 phenotypes in the *plt2, plt3* double and *wox5, plt2, plt3* triple mutants with an occurrence of  
157 periclinal QC-cell divisions in 53 % of the observed roots, indicating a predominant regulatory  
158 role of PLTs in periclinal QC cell divisions (Suppl. Fig. 2b, Suppl. Table 8).

159 To visualise correlations between QC division and CSC differentiation, we combined the  
160 acquired data in 2D-plots in which the frequencies of the two phenotypes are color-coded (Fig.  
161 4). This visualisation reveals a regular pattern for *Col-0* wild type roots, which peaks at one  
162 CSC-layer and no QC-divisions (Fig. 4a). The pattern of the *plt* single mutants is more irregular  
163 with a shift to less CSC-layers (indicating more differentiation) and more EdU-stained QC cells  
164 (indicating more QC divisions) compared to the wild type *Col-0* roots (Fig. 4b,c). The *plt2, plt3*  
165 double mutants have an additional maximum at a position showing no CSC layer and one  
166 divided QC cell, resulting in two phenotypic populations, one at a wild type-like position, the  
167 other showing a strong mutant phenotype (Fig. 4d). The 2D-pattern for the *wox5* mutant shifts  
168 to less CSC-layers and more QC-divisions with a maximum at no CSC-layers and two QC-  
169 divisions (Fig. 4e). The QC phenotype is more severe in the *wox5, plt3* double mutant towards  
170 more cell divisions and is even stronger in the *wox5, plt2, plt3* triple mutant which peaks at zero  
171 CSC layers and three QC-divisions (Fig. 4f,g). In summary, our data suggests that higher CSC  
172 differentiation correlates with a higher division rate in the QC, possibly in order to replenish  
173 missing stem cells by increased QC divisions.

174 WOX5 and PLT3 are expressed and localise to overlapping domains in the SCN of the  
175 *Arabidopsis* root and based on our results regulate SCN maintenance together. To test for  
176 functionality of our reporter lines, we used the mVenus (mV) tagged WOX5 and PLT3 versions  
177 driven by their endogenous promoters for rescue experiments in the respective mutant  
178 phenotypes in *Arabidopsis*. We observed a full rescue of the *wox5* mutant expressing  
179 *pWOX5::WOX5-mV* and a partial rescue of the *plt3* mutant expressing *pPLT3::PLT3-mV*



180 indicating that the labelling with mVenus did not or only very little influence WOX5 or PLT3  
181 functionality (Suppl. Fig. 1, Suppl. Table 14). In the PLT3-mV reporter line, we observed PLT3  
182 localisation in bright subnuclear structures, hereafter called nuclear bodies (NBs). Most  
183 frequently, we found PLT3 NBs in young, developing lateral root primordia (LRP) (Fig. 5a,  
184 Suppl. Movie 1) already at stages where PLT1 and PLT2 are not yet expressed<sup>20</sup>. Importantly,  
185 we occasionally observed PLT3 NBs in CSCs of established main roots, but never in QC cells  
186 (Fig. 5b-c'). To further examine the PLT3 NBs in a context where no other PLTs are expressed,  
187 we used an estradiol-inducible system to control expression of PLT3 and WOX5 transiently in  
188 *Nicotiana benthamiana*<sup>18</sup>. Similar to our observations in *Arabidopsis*, we found that PLT3  
189 mainly localises to NBs and to a lesser extend to the nucleoplasm (Fig. 6b). In co-expression  
190 experiments in *N. benthamiana*, we found that PLT3 recruits WOX5 to the same NBs, whereas  
191 on its own WOX5 remains homogenously localised within the nucleoplasm (Fig. 6g-g'', Suppl.  
192 Fig. 4a).

193 Next, we examined the domains possibly responsible for the localisation of PLT3 to NBs and  
194 found that the PLT3 amino acid (aa) sequence contains two glutamine (Q)-rich regions in the  
195 C-terminal part of the protein (see Fig. 6a). Proteins containing poly-Q stretches form  
196 aggregates or inclusions, a process often linked to pathological conditions in humans, such as  
197 Huntington's disease<sup>21</sup>. However, polyQ proteins also convey diverse cellular functions such  
198 as the promotion of nuclear assemblies (e.g. the transcription initiation complex), the formation  
199 of protein-protein complexes and the recruitment of other polyQ-containing proteins<sup>22,23</sup> as well  
200 as an enhancement in the transcriptional activation potential of TFs<sup>22,24,25</sup>. Interestingly, polyQs  
201 were also found to be enriched in TFs in plants<sup>26</sup>. Besides that, polyQ-containing proteins are  
202 proposed to act as key factors for the formation of RNA granules, which are ribonucleoprotein  
203 particles that mediate mRNA compartmentalisation<sup>27</sup>. Generally, the dynamic formation of  
204 subcellular structures could be necessary for a changing composition of the assemblies in

205 dependence of their functional status<sup>23</sup>. The transition of these proteins between condensed and  
206 soluble forms requires high flexibility in their protein structure, which is provided by the  
207 flexible polyQ-stretches. Poly-Q domains are predominantly positioned at the surface of a  
208 protein supporting the idea of their involvement in protein-protein interactions<sup>28</sup>.

209 Next, we tested, if the polyQ-stretches in PLT3 are responsible for the subnuclear localisation  
210 and the recruitment of WOX5 to NBs. To this end, we deleted the polyQ domains of PLT3 and  
211 expressed the resulting PLT3 $\Delta$ Q fused to mVenus transiently in *N. benthamiana*. We found  
212 that the subnuclear localisation and the recruitment of WOX did not change compared to the  
213 full-length PLT3 (see Fig. 6b,c,h-h’’). Therefore, we conclude that the polyQ domain in PLT3  
214 is not, or at least not alone, responsible for the subnuclear localisation and translocation to NBs.

215 Apart from proteins with polyQ domains, many proteins that form concentration-dependent  
216 aggregates contain larger, intrinsically disordered regions (IDRs) with a low complexity similar  
217 to yeast prions<sup>29</sup>. Recently, the existence of more than 500 proteins with prion-like behaviour  
218 in *Arabidopsis* was reported<sup>30</sup> and the presence of prion-like domains (PrDs) in protein  
219 sequences are predictable with web-based tools<sup>31</sup>. Therefore, we analysed the PLT and WOX5  
220 sequences using the PLAAC PrD prediction tool and found that PLT3 has three predicted PrDs  
221 in its aa sequence, two of them located at the C-terminus, containing the two polyQ-stretches  
222 (see Fig. 6a, Suppl. Fig. 4). PLT1 and PLT2 also show two predicted PrD domains, each, but  
223 no polyQ stretches within them. WOX5 does not show any predicted PrD domains, nor any  
224 polyQ stretches (Suppl. Fig. 4). Just like polyQ-proteins, prions are responsible for some  
225 neurodegenerative diseases in mammals<sup>33,34</sup>, but also their functional nature is becoming more  
226 eminent. The beneficial function of prions as a protein-based memory is highly discussed as  
227 their self-replicating conformations could act as molecular memories to transmit heritable  
228 information<sup>32,36</sup>. Prion-like proteins in *Arabidopsis* were first discovered by analysing protein  
229 sequences of 31 different organisms, identifying Q- and N-rich regions in the proteins to be

230 sufficient to cause protein aggregation<sup>37</sup>. In order to test the importance of the PrD domains in  
231 PLT3, we replaced the first PrD by a 27 aa linker  
232 (AAGAAGGAGGGAAAAAGGAGAAAAAGA) and deleted the C-terminally located PrDs.  
233 The resulting PLT3-version (PLT3 $\Delta$ PrD) was fused to the mVenus FP and expressed in *N.*  
234 *benthamiana* epidermal cells. We did not observe a localisation of PLT3 $\Delta$ PrD-mVenus to NBs,  
235 but in contrast a homogenous distribution within the nucleus (Fig. 6d). In addition, upon co-  
236 expression of PLT3 $\Delta$ PrD-mVenus with WOX5-mCherry, we observed that WOX5 was no  
237 longer recruited to NBs (Fig. 6i-i’). In line with this, we observed PLT3 NBs in developing  
238 *Arabidopsis* LRP expressing pPLT3::PLT3-mVenus, but no more NBs were found in a  
239 pPLT3::PLT3 $\Delta$ PrD-mVenus expressing line (Fig. 6e,f). Based on these observations, we  
240 conclude that the PrD domains of PLT3 are responsible for the localisation to NBs and the  
241 recruitment of WOX5 to NBs.

242 Proteins containing polyQ-stretches or PrDs are often involved in RNA binding, RNA  
243 processing and/or RNA compartmentalisation<sup>27,35,38-41</sup>. To test if PLT3 is involved in these  
244 processes, we performed an RNA-staining in *N. benthamiana* epidermal cells transiently  
245 expressing PLT3-mVenus with 5-ethynyl-2’-uridine (EU) (see Fig. 6j-j’’). EU is incorporated  
246 into RNA during transcription and we found that most of the stained RNA co-localises with the  
247 PLT3-mVenus NBs except for the EU-stained nucleolus (see Fig. 6j-j’’). Based on these  
248 observations, we conclude that the PLT NBs act as important sites for the recruitment of RNA  
249 and other factors, including WOX5.

250 Because the WOX5 and PLT protein expression domains overlap in the SCN and PLT1, PLT2  
251 and PLT3 contain PrD domains, we asked whether PLTs and WOX5 interact *in vivo*, especially  
252 in light of the observed recruitment of WOX5 to PLT3 NBs. For this, we used fluorescence  
253 lifetime imaging microscopy (FLIM) to measure Förster resonance energy transfer (FRET) in  
254 order to analyse the potential protein-protein interaction of WOX5 and PLTs *in vivo*. To

255 perform FLIM, we inducibly co-expressed WOX5-mVenus as donor together with individual  
256 PLTs-mCherry as acceptors for FRET in *N. benthamiana* leaf epidermal cells. The fluorescence  
257 lifetime of the donor fluorophore mVenus fused to WOX5 alone is  $3.03 \pm 0.03$  ns. A reduction  
258 of fluorescence lifetime is due to Förster resonance energy transfer (FRET) of the two  
259 fluorophores in very close proximity ( $\leq 10$  nm) mediated by the interaction of the two observed  
260 proteins. When free mCherry is co-expressed as a negative control the WOX5-mVenus mean  
261 fluorescence lifetime is not significantly decreased ( $2.97 \pm 0.07$  ns) (Fig. 7a,b,h, Suppl. Table  
262 12). When WOX5-mVenus is co-expressed with PLT1-mCherry the fluorescence lifetime  
263 significantly decreases to  $2.8 \pm 0.12$  ns, with PLT2-mCherry to  $2.7 \pm 0.13$  ns and with PLT3-  
264 mCherry to  $2.7 \pm 0.17$  ns, indicating FRET and hence protein-protein interactions (Fig. 7c-e,h,  
265 Suppl. Table 12). The observed interaction of WOX5 with PLT1, PLT2 or PLT3 lead us to  
266 assume that they regulate SCN maintenance by the formation of complexes, either all together  
267 or in diverse compositions depending on the cell identity or their function. Interestingly, we  
268 observed a stronger lifetime decrease of WOX5-mVenus in the PLT3 NBs than in the  
269 nucleoplasm, indicating that the NBs function as main interaction sites of WOX5 with PLT3  
270 (Fig. 7 i,j).

271 To address this, we measured the interaction between WOX5 and PLT3 in *Arabidopsis* roots  
272 via FLIM experiments in a translational line expressing WOX5-mVenus and PLT3-mCherry  
273 under control of their respective endogenous promoters. This results in very low protein  
274 concentration in comparison to the inducible system used in *N. benthamiana*. Probably due to  
275 this, we could not observe NBs in established root meristems of our *Arabidopsis* FLIM line and  
276 we could not measure a relevant decrease in fluorescence lifetime in contrast to the above-  
277 described experiments in *N. benthamiana* (Suppl. Fig. 3, Suppl. Table 13). In *Arabidopsis*  
278 seedlings, we only sometimes observed PLT3 NBs in the CSC layer of the root tip, but more

279 frequently in young, developing LRP (Fig. 5), whereas in *N. benthamiana* we observed NBs in  
280 almost all cells. Therefore, we argue that the formation of the NBs is concentration dependent.  
281 Moreover, we asked if the PrD and poly-Q domains in PLT3 are necessary for protein-protein  
282 interaction with WOX5. To test this, we performed FLIM experiments with mCherry-tagged  
283 full-length PLT3, PLT3 $\Delta$ Q and PLT3 $\Delta$ PrD as acceptors and WOX5-mVenus as donor in *N.*  
284 *benthamiana*. Here, we observed that co-expression of the PLT3 deletion variants did not lead  
285 to a significantly reduced fluorescence lifetime and therefore no protein-protein interaction  
286 takes place in comparison to the full-length version (see Fig. 7e-h). This implies that PrD  
287 domains containing the polyQ domains in PLT3 are necessary for the NB localisation, but also,  
288 notably, for protein complex-formation with WOX5.

289 In summary, our findings show that QC quiescence and CSC maintenance are mediated by  
290 mutual transcriptional regulation of PLTs and WOX5 as well as their direct protein-protein  
291 interaction and subnuclear partitioning to NBs due to PrDs.

## 292 **Discussion**

293 Based on our results we propose that the regulation of QC quiescence and CSC maintenance is  
294 mediated by mutual transcriptional regulation of PLTs and WOX5 by a negative feedback loop.  
295 Here, a high *PLT* expression in the QC-region is promoted by WOX5, which again confines  
296 WOX5 to a defined and restricted number of QC cells. In line with this, loss of PLTs lead to an  
297 expanded expression domain of *WOX5* and a decreased QC quiescence as more QC divisions  
298 occur. These observations are in agreement with previous findings, although just a minor role  
299 for PLT1 and PLT2 in confining *WOX5* expression was previously reported, as 17 % of *plt1*,  
300 *plt2* double mutant roots showed *WOX5* expression expanding into endodermal and columella  
301 stem cells<sup>6</sup>. As *WOX5* expression is normally limited to the QC, the question arises if, in absence  
302 of PLTs, either the *WOX5* expression domain expands to regions surrounding the QC or the QC  
303 region itself expands and therefore also the expression domain of *WOX5*. Interestingly, previous  
304 analyses show that the expression of several QC markers is missing or highly reduced in *plt*  
305 mutants, suggesting that they fail to maintain an intact QC<sup>5</sup>. The higher frequency of cell  
306 divisions in the QC region of *wox5* mutants can be explained by the reduced expression of  
307 *PLTs*, which consequently negatively impacts QC quiescence but also by a PLT-independent  
308 pathway where WOX5 itself may have a positive function on the QC quiescence. Previous  
309 findings suggest that WOX5 maintains QC quiescence through the repression of CYCD  
310 activity<sup>8</sup>. In light of our observation that PLT2, PLT3 and WOX5 show additive effects  
311 regarding the QC division phenotype, we propose a model in which WOX5 and PLTs could act  
312 in parallel pathways to maintain QC quiescence. The observed correlation between reduced QC  
313 quiescence and higher CSC differentiation could be a measure to replenish missing stem cells  
314 by QC divisions. This possible explanation is in agreement with the proposed function of the  
315 QC to serve as long-term stem cell reservoir, especially in case of stress or damage<sup>16</sup>.  
316 Supporting this, previous studies showed, even though uncorrelated, that loss of PLTs lead to

317 CSC differentiation and also an increase in ectopic cell divisions in the QC<sup>5,11</sup>. For CSC  
318 homeostasis, PLTs and WOX5 may act together in the same pathway, possibly by complex  
319 formation, as there is no observable additive effect in the multiple mutant roots which is in  
320 agreement with previous findings<sup>11</sup>. The potential of WOX5 to physically interact with PLT1,  
321 PLT2 and PLT3 indicates that they regulate CSC maintenance by the formation of complexes,  
322 either all together or in diverse homo- or heteromeric compositions depending on cell identity  
323 or function. In transient *N. benthamiana* experiments, PLT3 forms NBs and recruits WOX5  
324 into them. The stronger lifetime decrease in NBs compared to the nucleoplasm measured by  
325 FLIM implies that the NBs function as sites for protein-protein interaction of WOX5 with  
326 PLT3. We could observe PLT3 NBs in cells of the CSC layer of some *Arabidopsis* main root  
327 tips, but never in the QC region. On the other hand, PLT3 NBs were found more frequently in  
328 several cells of developing LRPs. LRPs are in a younger and less-determined stage than the  
329 main root and the observed subnuclear localisation to NBs could represent a marker for the  
330 occurring determination and future cell differentiation. This goes along with the observed  
331 localisation of PLT3 to NBs in the CSCs in some of the main roots. The PLT3 NBs could  
332 represent compartments for the recruitment of and interaction with WOX5 and possibly other  
333 factors involved in CSC fate determination and maintenance. Furthermore, we found that PLT3,  
334 in contrast to PLT1 and PLT2, has polyQ containing PrDs in its aa sequence that are necessary  
335 for the localisation to NBs and for complex-formation with WOX5. Proteins containing polyQ-  
336 stretches or PrDs are often involved in RNA binding, RNA processing and/or RNA  
337 compartmentalisation<sup>27,35,38-41</sup> and indeed, the PLT3 NBs co-localise with RNA. Just as PLT3,  
338 FLOWERING CONTROL LOCUS A (FCA) is a PrD-containing protein<sup>30</sup> that localises to  
339 subnuclear structures<sup>41</sup>. The FCA bodies separate from the cytosol by liquid-liquid phase  
340 separation to provide compartments for RNA 3'-end processing factors<sup>41</sup>. Similarly, PLT3 NBs  
341 could represent compartments for the recruitment of interacting factors and RNA for further

342 processing, sequestration or transportation. As PLT3 is a TF, the co-localising RNA could also  
343 represent newly transcribed RNA at the transcription sites where PLT3 binds to DNA, e.g. the  
344 WOX5 promoter region<sup>12</sup>. The possible liquid-like nature of the PLT3 NBs will be an  
345 interesting subject for further studies investigating its putative phase separation properties.

346 To summarize our results in a model, we propose that the regulation of QC quiescence and CSC  
347 maintenance are not only mediated by the mutual transcriptional regulation of PLT and WOX5,  
348 but also, importantly, by building protein complexes that are differentially localised within  
349 distinct nuclei in the SCN (see Fig. 8). The observed subnuclear localisation of PLT3 to NBs  
350 could represent a marker for the determination to future cell differentiation in the CSC layer.  
351 Furthermore, the PrD and polyQ domains in PLT3 may act as an initial starting point to  
352 compartmentalise and partition WOX5 that has moved from the QC towards the CSC layer into  
353 RNA-containing nuclear bodies, possibly by concentration-dependent liquid-liquid phase  
354 separation process. The observed sites could represent transcriptionally active sites for the  
355 regulation of target genes involved in CSC fate determination. The dynamic  
356 compartmentalization to subcellular or subnuclear microdomains of proteins with intrinsically  
357 disorder, PrD and/or polyQ domains was shown to have severe effects, e.g. in human  
358 pathological disorders (e.g. Huntington's disease). In *Arabidopsis*, it could present a fast and  
359 reversible concentration-dependent regulatory mechanism<sup>29</sup>, e.g. in case of PLT3 and WOX5  
360 to determine CSC cell fate. It remains to be determined if liquid-liquid phase separation is the  
361 underlying mechanism of the observed subnuclear compartmentalisation and if also other  
362 processes in determination of cell fates and stemness in *Arabidopsis* are regulated by this  
363 mechanism.



364 **Methods**

365 **Cloning.** pWOX5::mVenus-NLS, pWOX5::WOX5-mVenus, pPLT3::PLT3-mVenus,  
366 pPLT3::PLT3-mCherry, pPLT3::PLT3 $\Delta$ PrD-mVenus and  $\beta$ -estradiol inducible  
367 PLT3 $\Delta$ PrD-mVenus were created by using the GreenGate cloning method<sup>42</sup>. The internal *BsaI*  
368 restriction sites in the WOX5 promoter and WOX5 CDS were removed by PCR amplification  
369 of the sequences upstream and downstream of the *BsaI* sites with primer pairs whereof one  
370 primer has an altered nucleotide sequence at this site (Supplementary Table 1), followed by an  
371 overlap extension PCR to reconnect the gene fragments. The sequences upstream of the ATG  
372 start codon of WOX5 (4654 bp) and PLT3 (4494 bp) were used as promoter regions and were  
373 amplified by PCR and primers to add flanking *BsaI* restriction sites and matching overlaps for  
374 the GreenGate cloning system. Afterwards they were cloned into the GreenGate entry vector  
375 pGGA000 via *BsaI* restriction and ligation. The GreenGate promoter module carrying the  $\beta$ -  
376 estradiol inducible cassette was provided by<sup>43</sup>. The CDS of WOX5, PLT3 and PLT3 $\Delta$ PrD as  
377 well as the FPs mVenus and mCherry were amplified by PCR using adequate primer pairs to  
378 add flanking *BsaI* restriction sites and matching overlaps for cloning into the GreenGate entry  
379 vectors pGGC000 (for CDS) and pGGD000 (for FPs) via *BsaI* restriction and ligation. All  
380 created entry vectors were confirmed by sequencing. The expression cassettes were created  
381 with a GreenGate reaction using pGGZ001 as destination vector. The correct assembly of the  
382 modules was controlled by sequencing. All module combinations used to construct the  
383 expression vectors can be found in Supplementary Table 3.

384 All other inducible constructs for *N. benthamiana* expression (free mCherry, WOX5-mVenus,  
385 PLT1-mVenus, PLT2-mVenus, PLT3-mVenus, PLT3 $\Delta$ Q-mVenus) were created by Gateway  
386 cloning (Invitrogen<sup>TM</sup>, Thermo Fisher Scientific Inc.). The CDS of WOX5, PLT1, PLT2, PLT3  
387 and PLT3 $\Delta$ Q were amplified and cloned into pENTR/D-TOPO<sup>®</sup>. The Entry-vectors were  
388 confirmed by sequencing. The destination vector carrying the mVenus (pRD04) is based on

389 pMDC7<sup>44</sup> which contains a  $\beta$ -estradiol inducible system for expression *in planta*. The mVenus  
390 was introduced via restriction/ligation C-terminally to the Gateway cloning site. The destination  
391 vector carrying the mCherry (pABindmCherry) was described before<sup>45</sup>. The expression vectors  
392 were created by LR-reaction of destination and entry vectors. Gateway expression vectors were  
393 verified by test digestion.

394 For the creation of the domain-deletion variants of PLT3 (PLT3 $\Delta$ Q and PLT3 $\Delta$ PrD), the CDS  
395 parts upstream and downstream of the desired sequence deletions were amplified with PCR and  
396 afterwards reconnected with overlap-PCR. The 27 aa linker  
397 (AAGAAGGAGGGAAAAAGGAGAAAAAGA) to replace the first PrD in PLT3 $\Delta$ PrD was  
398 also introduced by overlap-PCR. All primer used for cloning can be found in Supplementary  
399 table 1.

400 **plant work.** All *Arabidopsis* lines used in this study were in the Columbia (*Col-0*) background.  
401 The single mutants *wox5-1* and *plt3-1* have been described before<sup>9</sup> (Supplementary table 4).  
402 The *plt2* (SALK\_128164) and *wox5-1* (SALK038262) single mutants were provided by the  
403 *Arabidopsis* Biological Resource Center (ABRC, USA). The homozygous double and triple  
404 mutants were created by crossings (Supplementary table 4) and homozygous F3 genotypes were  
405 confirmed by PCR with appropriate primer pairs (Supplementary Table 2). The transgenic lines  
406 were created by floral dip as described before<sup>46</sup> except for the published, transgenic *Col-0* lines  
407 with pPLT3::erCFP and pPLT3::PLT3-YFP<sup>9</sup> constructs. They were crossed into the *wox5-1*  
408 mutant background. Homozygous lines were confirmed by genotyping and hygromycin  
409 selection. All plants for crossing, floral dips, genotyping and seed amplification were grown on  
410 soil in phytochambers under long day (16 h light/ 8 h dark) conditions at 21 °C. For microscopy  
411 *Arabidopsis* seeds were fume-sterilised (50 ml 13 % sodiumhypochlorite (v/v) + 1 ml  
412 hydrochloric acid), imbedded in 0.2 % (w/v) agarose, stratified at 4 °C for 2 days and plated on  
413 GM agar plates (1/2 strength Murashige Skoog medium including Gamborg B5 vitamins, 1.2 %

414 (w/v) plant agar, 1 % (w/v) sucrose, supplemented with 0.05 % (w/v) MES hydrate).  
415 *Arabidopsis* seedlings were grown for 5 days under continuous light at 21 °C and directly  
416 imaged afterwards.

417 **Cell wall and plasma membrane staining.** For root imaging, the cell walls in *Arabidopsis*  
418 seedlings were stained by incubation in aqueous solutions of either 10 µM propidium iodide  
419 (PI) or 2.5 µM FM4-64 dye (Invitrogen™, Thermo Fisher Scientific Inc.). The staining solution  
420 was used as mounting medium for microscopy.

421 ***N. benthamiana* infiltration.** For transient gene expression in *N. benthamiana*, the  
422 *Agrobacterium* strain GV3101::pMP50 was used as vector, carrying plasmids with the desired  
423 constructs and additionally either the helper plasmid p19 as silencing suppressor or the helper  
424 plasmid pSOUP that harbours a replicase needed for GreenGate vectors. Cultures were grown  
425 over night in 5 ml dYT-medium at 28 °C on a shaker. The cultures were centrifuged for 10 min  
426 at 3345 g, the pellet was resuspended in infiltration medium (5 % (w/v) sucrose, 0.01 % (v/v)  
427 Silwet, 0.01 % (w/v) MgSO<sub>4</sub>, 0.01 % (w/v) glucose, 450 µM acetosyringone) to an optical  
428 density OD<sub>600</sub> of 0.4 and cultures were incubated for one hour at 4 °C. The infiltration was done  
429 either with one single or with a combination of two different *Agrobacteria* cultures for co-  
430 expression of two constructs. A syringe without needle was used for the infiltration on the  
431 adaxial side of the leaves of well-watered *N. benthamiana* plants. For the expression of  
432 GreenGate constructs, an *Agrobacterium* strain carrying the p19 plasmid was co-infiltrated. The  
433 expression was induced 2-5 days after infiltration by applying an aqueous β-estradiol solution  
434 (20 µM β-Estradiol, 0.1 % (v/v) Tween®-20) to the adaxial leaf surface. Imaging or FLIM  
435 experiments were done 3 to 16 hours after induction, depending on the expression level.

436 **SCN staining.** *Arabidopsis* seedlings were grown under continuous light for 5 days on GM  
437 agar plates without sucrose and then transferred on fresh plates containing additionally 7 µg/ml  
438 EdU to continue growing for 24 hours. Afterwards we performed an mPS-PI staining like

439 described before<sup>17</sup>. Preliminary to the clearing step, the EdU-staining was performed. The  
440 permeabilisation of the cells and the subsequent staining of EdU-containing DNA with Alexa  
441 Fluor<sup>®</sup> 488 was done as described in the Click-it<sup>®</sup> EdU Imaging Kits from Invitrogen<sup>™</sup>  
442 (Thermo Fisher Scientific Inc.) with adapted incubation times for *Arabidopsis* seedlings  
443 (permeabilisation for 1-2 h and click-reaction for 1 h). The click-reaction cocktail was prepared  
444 freshly with self-made solutions (Tris buffer with 50 mM Tris and 150 mM NaCl at pH 7.2-  
445 7.5; 4 mM CuSO<sub>4</sub>; 1.5 μM Alexa Fluor<sup>®</sup> 488 picolyl azide; 50 mM ascorbic acid). The Alexa  
446 Fluor<sup>®</sup> 488 picolyl azide (Thermo Fisher Scientific Inc.) was added from a 500 μM stock in  
447 DMSO. The ascorbic acid was added last from a freshly prepared aqueous 500 mM stock  
448 solution. After staining was done, the clearing step with chloralhydrate was performed like  
449 described before<sup>17</sup>.

450 Images were acquired with a ZEISS LSM880 confocal microscope. z-stacks through the QC-  
451 region were recorded to obtain transversal views. In order to calculate the CSC phenotype, the  
452 number of CSC layers was counted in xy-images of each root. The QC-division phenotype is  
453 the number of EdU-Alexa Fluor<sup>®</sup> 488-stained cells in the QC, which was counted in the cross-  
454 sectional images up to a maximal number of 4 stained QC cells. The phenotype frequencies of  
455 CSC differentiation and QC divisions (Fig. 3) were visualised in bar graphs with Excel  
456 (Microsoft Office 365 ProPlus, Microsoft Corporation). In order to correlate the two  
457 investigated phenotypes, we combined the CSC data and the QC-division data in 2D-plots. The  
458 combined QC/CSC-phenotype of every root was entered in a matrix with QC-divisions on the  
459 x- and CSC layers on the y-axis. 2D plots were created with Origin 2018b (OriginLab  
460 Corporation).

461 **RNA staining.** The RNA-staining in *N. benthamiana* epidermal cells was done on *N.*  
462 *benthamiana* leaves harboring a construct for a β-Estradiol inducible *PLT3-mVenus* expression.  
463 5-ethynyl-2'-uridine (EU) was infiltrated in *N. benthamiana* leaves the day before staining. The

464 expression of PLT3-mVenus was induced the next morning, 3 hours before fixation of the plant  
465 tissue. For fixation and permeabilisation of cells, pieces of the leaves were cut and treated with  
466 4 % (w/v) paraformaldehyde and 0.5 % (v/v) TritonX-100 in PBS under vacuum for 1 h. The  
467 click-reaction of EU with Alexa Fluor® 555 picolyl azide was performed similarly to the EdU-  
468 Alexa Fluor® 488-staining described for the SCN staining in this article. A DAPI-  
469 counterstaining was carried out afterwards by incubating the leaf pieces in 0.1 µg/ml DAPI for  
470 30 min. PBS was used as mounting medium for imaging.

471 **Microscopy.** Imaging of *Arabidopsis* roots and *Nicotiana* leaves was carried out with a ZEISS  
472 LSM780 or LSM880. Excitation and detection of fluorescent emission of fluorescent dyes was  
473 done as follows: DAPI was excited at 405 nm and emission was detected at 408-486 nm,  
474 Cerulean was excited at 458 nm and emission was detected at 460-510 nm; CFP was excited at  
475 458 nm and emission was detected at 463-547 nm. mVenus was excited at 514 nm and emission  
476 was detected at 517-560 nm, or for co-expression with red dyes excited at 488 nm and detected  
477 at 500-560 nm. YFP was excited at 514 nm and emission was detected at 518-548 nm. Alexa  
478 Fluor® 488 was excited at 488 nm and emission was detected at 490-560 nm. Alexa Fluor® 555  
479 was excited at 561 nm and emission was detected at 565-640 nm. PI was excited at 561 nm and  
480 emission was detected at 590-710 nm. FM4-64 was excited at 514 nm or 561 nm and emission  
481 was detected at 670-760 nm. mCherry was excited at 561 nm and emission was detected at  
482 590-640 nm. Imaging of more than one fluorophore was done in sequential mode to avoid cross  
483 talk. The movie of pPLT3::PLT3-mVenus in a lateral root primordium was acquired with a  
484 MuViSPIM (Luxendo, Bruker) light sheet microscope and a 40x/0.8 Nikon objective with a  
485 1.5x tube lens on the detection axis to provide a 60x magnification.

486 **Image deconvolution.** The microscope images in Fig. 5 a, c-c' were deconvolved with  
487 Huygens 16.10.0p3 64b (Scientific Volume Imaging B.V.).

488 **Analyses of expression patterns and levels in *Arabidopsis*.** For the comparison of relative  
489 fluorescence levels in the SCN of 5 day old *Arabidopsis* seedlings expressing either  
490 transcriptionally FP tagged *PLT3* (*pPLT3::erCFP*) or translationally FP tagged *PLT3*  
491 (*pPLT3::PLT3-YFP*) driven by the endogenous *PLT3* promoter in either the *Col-0* wild type or  
492 the *wox5-1* mutant, images of 9-16 roots per genotype were acquired with constant settings per  
493 FP. A ZEISS LSM880 confocal microscope was used. The mean fluorescence levels were  
494 measured with Fiji<sup>47</sup> in equally sized rectangular ROIs including the QC and CSC positions in  
495 the SCN. The thereby generated values were normalised to the *Col-0* mean fluorescence  
496 intensity and visualised in box and scatter plots created with Origin 2018b (OriginLab  
497 Corporation).

498 Images of the root tips of 5 day old *Arabidopsis* seedlings expressing *mVenus-NLS* driven by  
499 the endogenous *WOX5* promoter in *Col-0* and *plt2* or *plt3-1* single mutants and the *plt2,plt3*  
500 double mutant were acquired. Additionally, z-stacks through the QC region of the roots were  
501 recorded to get a transversal view of the QC. The visualisation and counting of nuclei with  
502 *WOX5* expression (fig. 2) was done with Imaris (version 9.1.2, Bitplane, Oxford Instruments  
503 plc). Box and scatter plots showing the number of expressing nuclei were created with Origin  
504 2018b (OriginLab Corporation). For the heat-map images, 10 acquired images were overlaid  
505 with Fiji<sup>47</sup> and the resulting fluorescence distribution was displayed with a 16-colors lookup  
506 table. To calculate the area of lateral *WOX5* expression in the QC region, a freehand-ROI  
507 surrounding the expressing cells was created in every image with Fiji<sup>47</sup>. The ROI-areas were  
508 visualised in box and scatter plots created with Origin 2018b (OriginLab Corporation).

509 **FLIM measurements.** FLIM was performed either in *N. benthamiana* leaf epidermal cells  
510 expressing the desired gene combinations or in roots of 6-10 dag old *Arabidopsis* seedlings  
511 expressing *WOX5-mVenus* and *PLT3-mCherry* with their endogenous promoters. The FLIM  
512 measurements in *Arabidopsis* were performed in LRPs due to higher fluorescence levels and

513 less movement during measurements compared to the RAM. mVenus-tagged proteins were  
514 always used as donor and mCherry-tagged proteins as acceptor for FRET. A ZEISS LSM 780  
515 was used for the experiments equipped with a single-photon counting device (Hydra Harp 400,  
516 PicoQuant GmbH). The mVenus donor was excited with a linearly polarized diode laser (LDH-  
517 D-C-485) at 485 nm and a pulse frequency of 32 MHz. The excitation power was adjusted to  
518 0.1-0.5  $\mu$ W at the objective (C-Apochromat 40x/1.2 W Corr M27, ZEISS) for experiments in  
519 *N. benthamiana* and 1.5-2  $\mu$ W for experiments in *Arabidopsis*. The higher laser power in  
520 *Arabidopsis* was needed due to lower fluorescence levels.  $\tau$ -SPAD single photon counting  
521 modules with 2 channel detection units (PicoQuant GmbH) and a bandpass filter (534/39) were  
522 used to detect parallel and perpendicular polarized emission of the mVenus fluorescence.  
523 Images were acquired with a frame size of 256x256 pixel, a pixel dwell time of 12.6  $\mu$ s and a  
524 zoom factor of 8. 40 to 60 frames were recorded in the *N. benthamiana* experiments, 80 frames  
525 in the experiments performed in *Arabidopsis*.

526 Fluorescent lifetimes were obtained by further analyses of the acquired data with  
527 SymPhoTime64 (PicoQuant GmbH). The instrument response function (IRF) of the microscope  
528 hardware is needed for fluorescence lifetime calculation to correct the system-specific internal  
529 time lag between laser pulse and data acquisition. The IRF was recorded preliminary to each  
530 experiment by time-correlated single photon counting (TCSPC) of an aqueous solution of  
531 erythrosine B in saturated potassium iodide. For data analysis of *N. benthamiana* experiments,  
532 an intensity threshold of 100-200 photons per pixel was applied to remove background  
533 fluorescence and a monoexponential fit was used. Due to low fluorescence intensities in  
534 *Arabidopsis* experiments, no threshold was applied to obtain the maximal possible photon  
535 number. In this case, a two-exponential fit was used to separate the mVenus fluorescence signal  
536 from the background fluorescence created by the plant tissue. This results in two lifetimes  
537 whereof one matches with the mVenus fluorescence lifetime of about 3 ns and the other

538 representing the very short background lifetime of less than 0.4 ns. All data was obtained in at  
539 least two independent experiments. For visualisation of the lifetimes, box and scatter plots were  
540 created with Origin 2018b (OriginLab Corporation). Lifetime images of representative  
541 measurements were created with a pixel wise FLIM-fit in SymPhoTime64 (PicoQuant GmbH).  
542 The line graph showing the lifetime difference between the bodies and the nucleoplasm of  
543 WOX5-mVenus co-expressed with PLT3-mCherry was created using Excel (Microsoft Office  
544 365 ProPlus, Microsoft Corporation).

545 **Prediction of protein domains.** The PrDs in the WOX5, PLT1, PLT2 and PLT3 aa sequences  
546 were predicted with the PLAAC application<sup>31</sup>. The nuclear localisation signals (NLSs) of  
547 WOX5 and the studied PLT proteins were predicted with cNLS Mapper<sup>48</sup> for WOX5 and PLT3  
548 and SeqNLS<sup>49</sup> for PLT1 and PLT2.

549 **Figure assembly.** All figures in this study were assembled using Adobe Photoshop CS5 (Adobe  
550 Inc.).



551 **Acknowledgements**

552 We would like to acknowledge funding of R.C.B. by the Deutsche Forschungsgemeinschaft  
553 (DFG) through grant Sta1212/1-1 to Y.S. We thank Andrea Bleckmann for sharing the  
554 Greengate Cerulean construct, Renze Heidstra and Ben Scheres for sharing published  
555 *Arabidopsis* lines (PLT::PLT-YFP, PLT::CFP and *plt* mutants). We also thank Rüdiger Simon  
556 and Peter Welters for critical discussion.

557 **Author contributions**

558 R.C.B., V.I.S., A.A., L.C., and G.K.K. carried out the experiments. Y.S. and R.C.B. designed  
559 the experiments, analysed and interpreted the data. S.W.P. contributed to FLIM data analyses.  
560 A.M. carried out light sheet imaging. Y.S. and R.C.B. wrote the manuscript. All authors  
561 commented on the manuscript.

562 **Competing interests**

563 The authors declare no competing interests.

564 **Material & correspondence**

565 Correspondence and material requests should be addressed to Yvonne Stahl  
566 (Yvonne.Stahl@hhu.de).

567 **References**

- 568 1. van den Berg, C., Willemsen, V., Henriks, G., Weisbeek, P. & Scheres, B. Short-range  
569 control of cell differentiation in the Arabidopsis root meristem. *Nature* **390**, 287–289  
570 (1997).
- 571 2. Dolan, L. *et al.* Cellular organisation of the Arabidopsis thaliana root. *Development* **119**,  
572 71–84 (1993).
- 573 3. Benfey, P. N. & Scheres, B. Root development. *Curr Biol* **10**, 13 (2000).
- 574 4. Drisch, R. C. & Stahl, Y. Function and regulation of transcription factors involved in root  
575 apical meristem and stem cell maintenance. *Front Plant Sci* **6**, 505;  
576 10.3389/fpls.2015.00505 (2015).
- 577 5. Aida, M. *et al.* The PLETHORA genes mediate patterning of the Arabidopsis root stem cell  
578 niche. *Cell* **119**, 109–120; 10.1016/j.cell.2004.09.018 (2004).
- 579 6. Sarkar, A. K. *et al.* Conserved factors regulate signalling in Arabidopsis thaliana shoot and  
580 root stem cell organizers. *Nature* **446**, 811–814; 10.1038/nature05703 (2007).
- 581 7. Pi, L. *et al.* Organizer-Derived WOX5 Signal Maintains Root Columella Stem Cells through  
582 Chromatin-Mediated Repression of CDF4 Expression. *Dev Cell* **33**, 576–588;  
583 10.1016/j.devcel.2015.04.024 (2015).
- 584 8. Forzani, C. *et al.* WOX5 suppresses CYCLIN D activity to establish quiescence at the center  
585 of the root stem cell niche. *Curr Biol* **24**, 1939–1944; 10.1016/j.cub.2014.07.019 (2014).
- 586 9. Galinha, C. *et al.* PLETHORA proteins as dose-dependent master regulators of Arabidopsis  
587 root development. *Nature* **449**, 1053–1057; 10.1038/nature06206 (2007).
- 588 10. Mähönen, A. P. *et al.* PLETHORA gradient formation mechanism separates auxin  
589 responses. *Nature* **515**, 125–129; 10.1038/nature13663 (2014).
- 590 11. Ding, Z. & Friml, J. Auxin regulates distal stem cell differentiation in Arabidopsis roots.  
591 *PNAS* **107**, 12046–12051; 10.1073/pnas.1000672107 (2010).
- 592 12. Shimotohno, A., Heidstra, R., Blilou, I. & Scheres, B. Root stem cell niche organizer  
593 specification by molecular convergence of PLETHORA and SCARECROW transcription  
594 factor modules. *Genes Dev* **32**, 1085–1100; 10.1101/gad.314096.118 (2018).
- 595 13. Cruz-Ramírez, A. *et al.* A SCARECROW-RETINOBLASTOMA protein network controls  
596 protective quiescence in the Arabidopsis root stem cell organizer. *PLoS biology* **11**,  
597 e1001724; 10.1371/journal.pbio.1001724 (2013).
- 598 14. Kidner, C., Sundaresan, V., Roberts, K. & Dolan, L. Clonal analysis of the Arabidopsis root  
599 confirms that position, not lineage, determines cell fate. *Planta* **211**, 191–199;  
600 10.1007/s004250000284 (2000).
- 601 15. González-García, M.-P. *et al.* Brassinosteroids control meristem size by promoting cell  
602 cycle progression in Arabidopsis roots. *Development* **138**, 849–859; 10.1242/dev.057331  
603 (2011).
- 604 16. Vilarrasa-Blasi, J. *et al.* Regulation of plant stem cell quiescence by a brassinosteroid  
605 signaling module. *Dev Cell* **30**, 36–47; 10.1016/j.devcel.2014.05.020 (2014).
- 606 17. Truernit, E. *et al.* High-resolution whole-mount imaging of three-dimensional tissue  
607 organization and gene expression enables the study of Phloem development and structure  
608 in Arabidopsis. *Plant Cell* **20**, 1494–1503; 10.1105/tpc.107.056069 (2008).

- 609 18. Stahl, Y. *et al.* Moderation of Arabidopsis root stemness by CLAVATA1 and  
610 ARABIDOPSIS CRINKLY4 receptor kinase complexes. *Curr Biol* **23**, 362–371;  
611 10.1016/j.cub.2013.01.045 (2013).
- 612 19. Stahl, Y., Wink, R. H., Ingram, G. C. & Simon, R. A Signaling Module Controlling the  
613 Stem Cell Niche in Arabidopsis Root Meristems. *Curr Biol* **19**, 909–914;  
614 10.1016/j.cub.2009.03.060 (2009).
- 615 20. Du, Y. & Scheres, B. PLETHORA transcription factors orchestrate de novo organ  
616 patterning during Arabidopsis lateral root outgrowth. *PNAS* **114**, 11709–11714;  
617 10.1073/pnas.1714410114 (2017).
- 618 21. Scarafone, N. *et al.* Amyloid-like fibril formation by polyQ proteins: a critical balance  
619 between the polyQ length and the constraints imposed by the host protein. *PloS one* **7**,  
620 e31253; 10.1371/journal.pone.0031253 (2012).
- 621 22. Atanesyan, L., Günther, V., Dichtl, B., Georgiev, O. & Schaffner, W. Polyglutamine tracts  
622 as modulators of transcriptional activation from yeast to mammals. *Biol Chem* **393**, 63–70;  
623 10.1515/BC-2011-252 (2012).
- 624 23. Mikecz, A. von. PolyQ fibrillation in the cell nucleus: who's bad? *Trends Cell Biol* **19**, 685–  
625 691; 10.1016/j.tcb.2009.09.001 (2009).
- 626 24. Schwechheimer, C., Smith, C. & Bevan, M. W. The activities of acidic and glutamine-rich  
627 transcriptional activation domains in plant cells: design of modular transcription factors for  
628 high-level expression. *Plant Mol Biol* **36**, 195–204 (1998).
- 629 25. Gerber, H. *et al.* Transcriptional activation modulated by homopolymeric glutamine and  
630 proline stretches. *Science* **263**, 808–811; 10.1126/science.8303297 (1994).
- 631 26. Kottenhagen, N., Gramzow, L., Horn, F., Pohl, M. & Theißen, G. Polyglutamine and  
632 Polyalanine Tracts Are Enriched in Transcription Factors of Plants. *German conference on*  
633 *Bioinformatics*; 10.4230/OASICS.GCB.2012.93 (2012).
- 634 27. Castilla-Llorente, V. & Ramos, A. PolyQ-mediated regulation of mRNA granules assembly.  
635 *Biochem Soc Trans* **42**, 1246–1250; 10.1042/BST20140099 (2014).
- 636 28. Totzeck, F., Andrade-Navarro, M. A. & Mier, P. The Protein Structure Context of PolyQ  
637 Regions. *PloS one* **12**, e0170801; 10.1371/journal.pone.0170801 (2017).
- 638 29. Cuevas-Velazquez, C. L. & Dinneny, J. R. Organization out of disorder: liquid-liquid phase  
639 separation in plants. *Curr Opin Plant Biol* **45**, 68–74; 10.1016/j.pbi.2018.05.005 (2018).
- 640 30. Chakrabortee, S. *et al.* Luminidependens (LD) is an Arabidopsis protein with prion  
641 behavior. *PNAS* **113**, 6065–6070; 10.1073/pnas.1604478113 (2016).
- 642 31. Lancaster, A. K., Nutter-Upham, A., Lindquist, S. & King, O. D. PLAAC: a web and  
643 command-line application to identify proteins with prion-like amino acid composition.  
644 *Bioinformatics (Oxford, England)* **30**, 2501–2502; 10.1093/bioinformatics/btu310 (2014).
- 645 32. Shorter, J. & Lindquist, S. Prions as adaptive conduits of memory and inheritance. *Nature*  
646 *reviews. Genetics* **6**, 435–450; 10.1038/nrg1616 (2005).
- 647 33. Aguzzi, A., Nuvolone, M. & Zhu, C. The immunobiology of prion diseases. *Nat. Rev.*  
648 *Immunol.* **13**, 888–902; 10.1038/nri3553 (2013).
- 649 34. Kim, H. J. *et al.* Mutations in prion-like domains in hnRNPA2B1 and hnRNPA1 cause  
650 multisystem proteinopathy and ALS. *Nature* **495**, 467–473; 10.1038/nature11922 (2013).

- 651 35. Alberti, S., Halfmann, R., King, O., Kapila, A. & Lindquist, S. A systematic survey  
652 identifies prions and illuminates sequence features of prionogenic proteins. *Cell* **137**, 146–  
653 158; 10.1016/j.cell.2009.02.044 (2009).
- 654 36. Bailey, C. H., Kandel, E. R. & Si, K. The persistence of long-term memory: a molecular  
655 approach to self-sustaining changes in learning-induced synaptic growth. *Neuron* **44**, 49–  
656 57; 10.1016/j.neuron.2004.09.017 (2004).
- 657 37. Michelitsch, M. D. & Weissman, J. S. A census of glutamine/asparagine-rich regions:  
658 implications for their conserved function and the prediction of novel prions. *PNAS* **97**,  
659 11910–11915; 10.1073/pnas.97.22.11910 (2000).
- 660 38. Schomburg, F. M., Patton, D. A., Meinke, D. W. & Amasino, R. M. FPA, a gene involved  
661 in floral induction in Arabidopsis, encodes a protein containing RNA-recognition motifs.  
662 *Plant Cell* **13**, 1427–1436 (2001).
- 663 39. Macknight, R. *et al.* FCA, a Gene Controlling Flowering Time in Arabidopsis, Encodes a  
664 Protein Containing RNA-Binding Domains. *Cell* **89**, 737–745; 10.1016/S0092-  
665 8674(00)80256-1 (1997).
- 666 40. Sonmez, C. *et al.* RNA 3' processing functions of Arabidopsis FCA and FPA limit intergenic  
667 transcription. *PNAS* **108**, 8508–8513; 10.1073/pnas.1105334108 (2011).
- 668 41. Fang, X. *et al.* Arabidopsis FLL2 promotes liquid-liquid phase separation of  
669 polyadenylation complexes. *Nature* **569**, 265–269; 10.1038/s41586-019-1165-8 (2019).
- 670 42. Lampropoulos, A. *et al.* GreenGate---a novel, versatile, and efficient cloning system for  
671 plant transgenesis. *PloS one* **8**, e83043; 10.1371/journal.pone.0083043 (2013).
- 672 43. Denninger, P. *et al.* Distinct RopGEFs Successively Drive Polarization and Outgrowth of  
673 Root Hairs. *Curr. Biol.* **29**, 1854-1865.e5; 10.1016/j.cub.2019.04.059 (2019).
- 674 44. Curtis, M. D. & Grossniklaus, U. A gateway cloning vector set for high-throughput  
675 functional analysis of genes in planta. *Plant Physiol.* **133**, 462–469; 10.1104/pp.103.027979  
676 (2003).
- 677 45. Bleckmann, A., Weidtkamp-Peters, S., Seidel, C. A. M. & Simon, R. Stem cell signaling in  
678 Arabidopsis requires CRN to localize CLV2 to the plasma membrane. *Plant Physiol.* **152**,  
679 166–176; 10.1104/pp.109.149930 (2010).
- 680 46. Zhang, X., Henriques, R., Lin, S.-S., Niu, Q.-W. & Chua, N.-H. Agrobacterium-mediated  
681 transformation of Arabidopsis thaliana using the floral dip method. *Nat. Protoc.* **1**, 641–  
682 646; 10.1038/nprot.2006.97 (2006).
- 683 47. Schindelin, J. *et al.* Fiji: an open-source platform for biological-image analysis. *Nat.*  
684 *Methods* **9**, 676–682; 10.1038/nmeth.2019 (2012).
- 685 48. Kosugi, S., Hasebe, M., Tomita, M. & Yanagawa, H. Systematic identification of cell cycle-  
686 dependent yeast nucleocytoplasmic shuttling proteins by prediction of composite motifs.  
687 *PNAS* **106**, 10171–10176; 10.1073/pnas.0900604106 (2009).
- 688 49. Lin, J.-R. & Hu, J. SeqNLS: nuclear localization signal prediction based on frequent pattern  
689 mining and linear motif scoring. *PloS one* **8**, e76864; 10.1371/journal.pone.0076864 (2013).
- 690

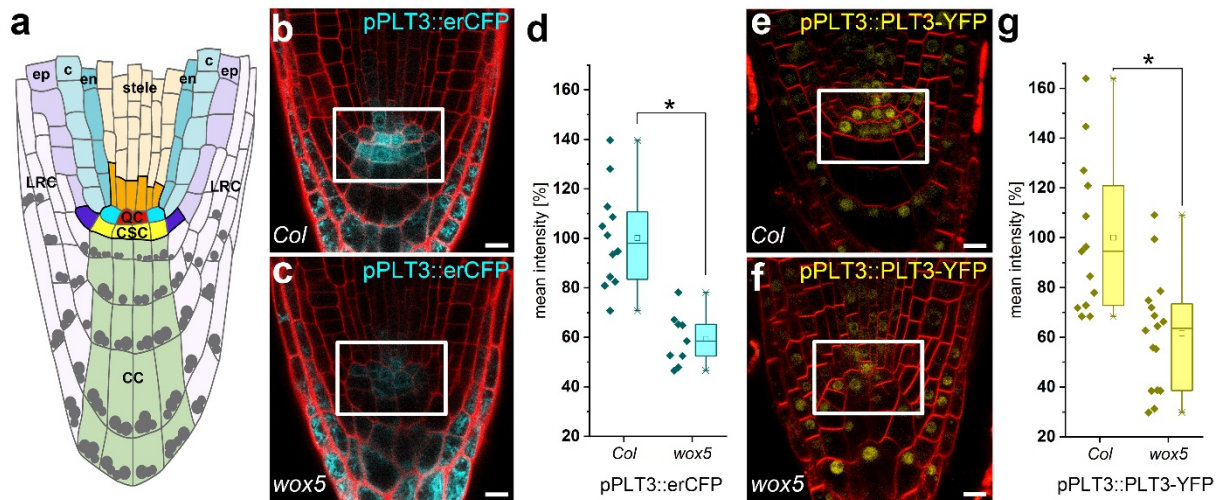

691  
 692 **Fig. 1 | WOX5 positively regulates PLT3 expression.** **a**, Schematic representation of the  
 693 *Arabidopsis* root meristem. The QC cells (red) maintain the surrounding stem cells (initials)  
 694 outlined in black together building the root stem cell niche (SCN). The different cell types are  
 695 colour-coded. QC = quiescent center (red); CSC = columella stem cells (yellow); CC =  
 696 columella cells (green); LRC = lateral root cap (light purple); ep = epidermis (dark purple); c =  
 697 cortex (light blue); en = endodermis (dark blue); **b,c**, Representative images of pPLT3::erCFP  
 698 (cyan) expressing and PI-stained (red) *Arabidopsis* roots in *Col* or *wox5* background,  
 699 respectively. **d**, Mean fluorescence intensities of the pPLT3::erCFP roots summarized in box  
 700 and scatter plots. The mean fluorescence intensity of the CFP signal in *Col* roots was set to  
 701 100%. **e,f**, Representative images of pPLT3::PLT3-YFP (yellow) expressing and FM4-64-  
 702 stained (red) *Arabidopsis* roots in *Col* or *wox5* background, respectively. **g**, Mean fluorescence  
 703 intensities of the pPLT3::PLT3-YFP expressing roots summarized in box and scatter plots. The  
 704 mean fluorescence intensity of the YFP signal in *Col* roots was set to 100%. **d,g**, Box = 25-  
 705 75 % of percentile, whisker = 1.5 interquartile range, – = median, □ = mean value, × =  
 706 minimum/maximum. Asterisks indicate statistically significant differences as analyzed by one-  
 707 way ANOVA and post-hoc multiple comparisons using the Holm-Sidak test ( $\alpha = 0.01$ ), number  
 708 of analyzed roots  $n = 9-16$ . **b,c,e,f**, Scale bars represent 10  $\mu\text{m}$ . SCN = stem cell niche; PI =  
 709 propidium iodide; YFP = yellow fluorescent protein; CFP = cyan fluorescent protein.

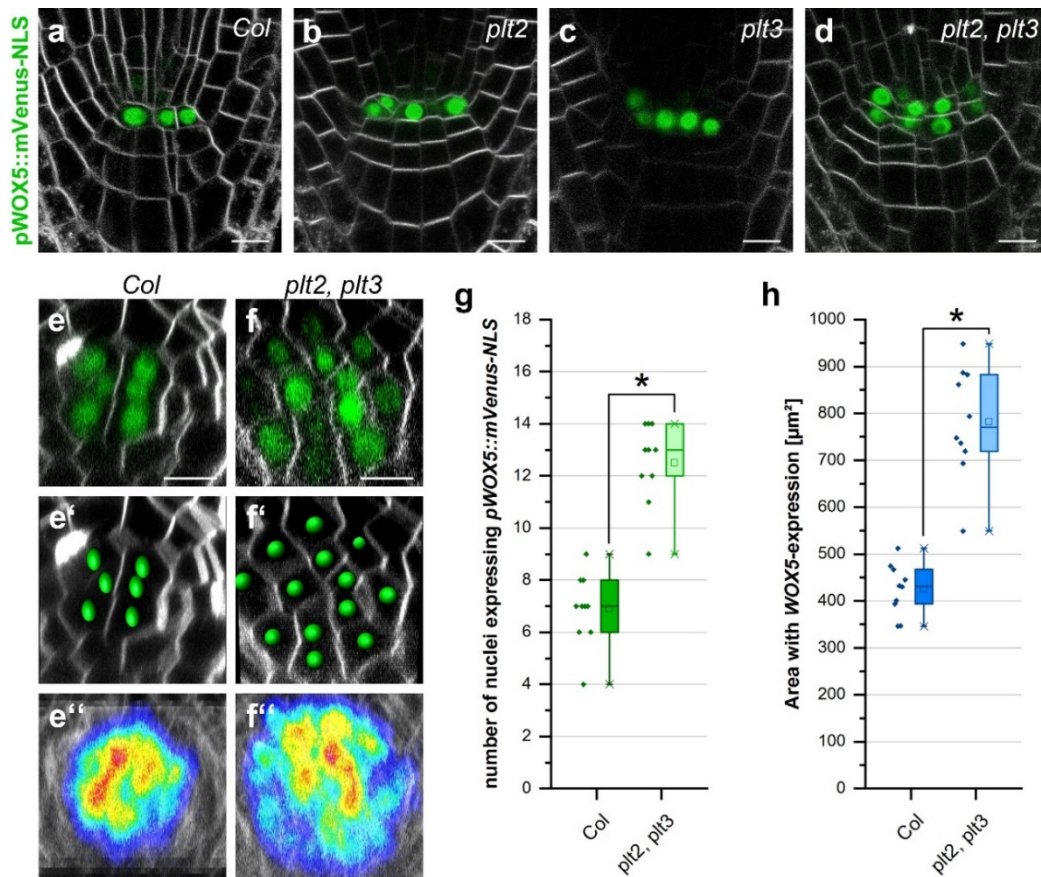

710 **Fig. 2 | PLTs constrain the WOX5 expression domain.** a-f, Representative FM4-64-stained  
 711 *Arabidopsis* roots (grey) expressing pWOX5::mVenus-NLS (green) in *Col*, *plt2*, *plt3* and  
 712 *plt2,plt3* double mutant background in longitudinal (a-d), or transversal (e-f) optical sections.  
 713 e',f', Analysis of representative images in (e) and (f) in Imaris in order to detect and count  
 714 individual expressing nuclei. e'',f'', Overlay of 10 roots showing the area of detected  
 715 fluorescence (high levels in red, low levels in blue) in *Col* and *plt2,plt3* double mutant roots. g,  
 716 Number of nuclei expressing pWOX5::mVenus-NLS in *Col* and *plt2,plt3* double mutant roots  
 717 summarized in box and scatter plots. h, Area of WOX5 expression in  $\mu\text{m}^2$  in *Col* and *plt2,plt3*  
 718 double mutant roots summarized in box and scatter plots. g,h Box = 25-75 % of percentile,  
 719 whisker = 1.5 interquartile range, - = median, □ = mean value, × = minimum/maximum.  
 720 Asterisks indicate statistically significant differences as analyzed by one-way ANOVA and  
 721 post-hoc multiple comparisons using the Holm-Sidak test ( $\alpha = 0.01$ ). Number of analysed roots  
 722 n = 10. Scale bars represent 10  $\mu\text{m}$ ; NLS = nuclear localisation signal.

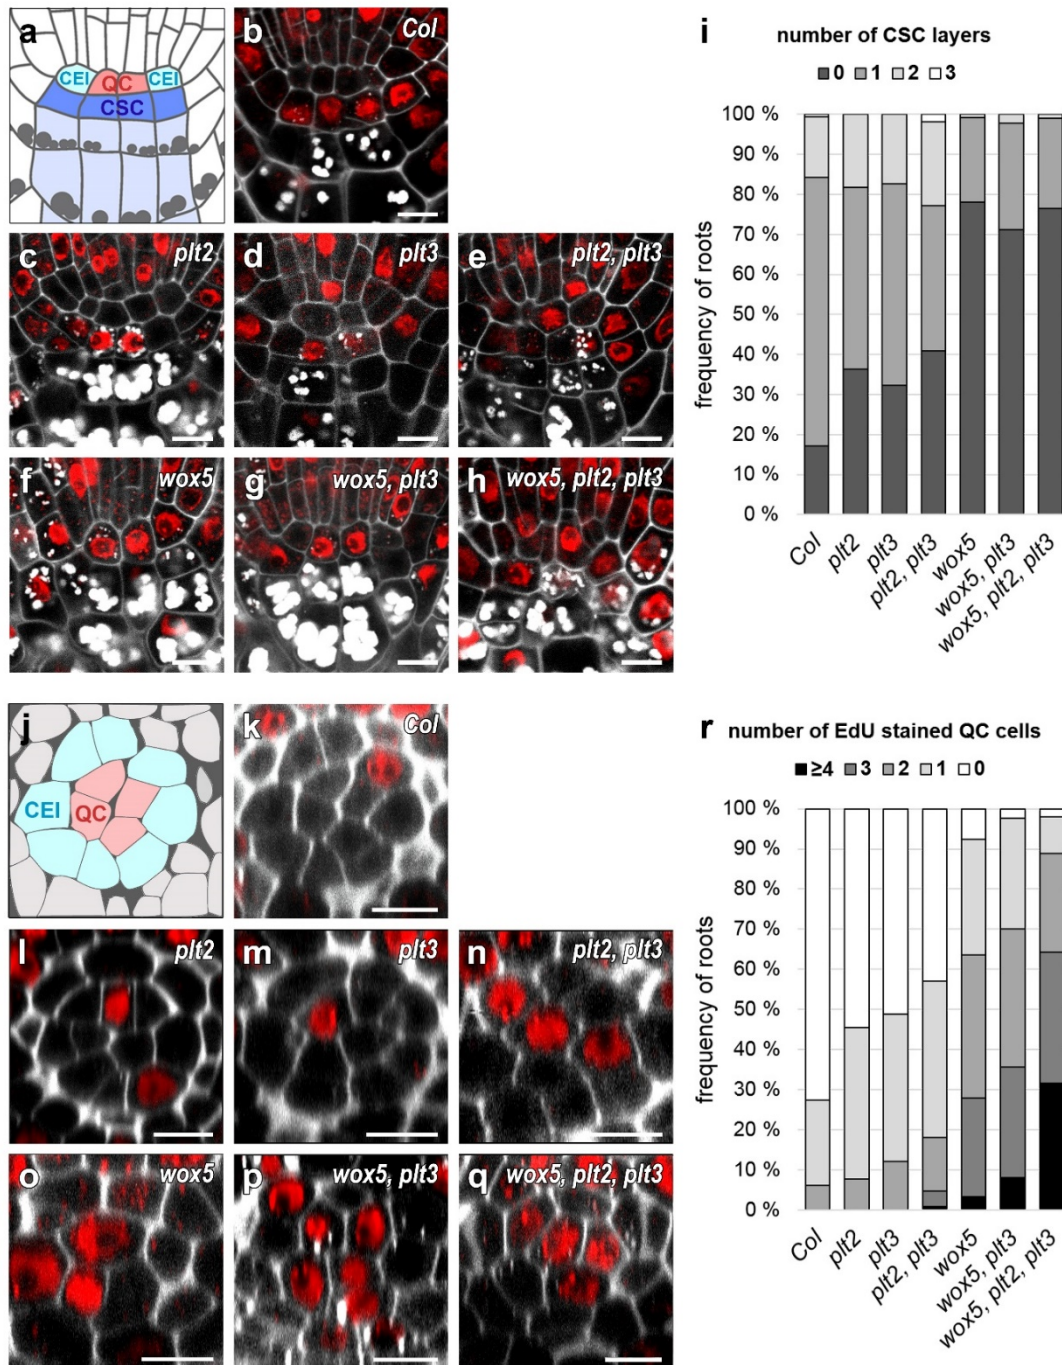

723 **Fig. 3 | *plt* and *wox5* mutants show more CSC differentiation and QC divisions.** a,  
 724 Schematic representation of a longitudinal section of an *Arabidopsis* RM. QC cells are marked  
 725 in red, CSCs are marked in dark blue, CCs in light blue. Combined mPSPI (grey) and EdU (red)  
 726 staining for 24 hours (SCN staining) in order to analyse the CSC (a-i) and QC division  
 727 phenotype (j-r) within the same roots. b-h, Representative images of the SCN staining in *Col*,  
 728 and the indicated single, double and triple mutant roots. i, Analyses of the SCN staining for

729 CSC phenotypes. Frequencies of roots showing 0, 1, 2, or 3 CSC layers are plotted as bar  
730 graphs. **j**, Schematic representation of a transversal section of an *Arabidopsis* RM. QC cells are  
731 marked in red, CEI initials are marked in turquoise. **r**, Analyses of the SCN staining for QC  
732 division phenotypes. Frequencies of roots showing 0, 1, 2, 3 or  $\geq 4$  dividing QC cells are plotted  
733 as bar graphs. Number of roots  $n = 77-146$  from 2-5 independent experiments. QC = quiescent  
734 center, CSC = columella stem cell, CEI = cortex endodermis initial, SCN = stem cell niche,  
735 mPSPI = modified pseudo-Schiff propidium iodide, EdU = 5-ethynyl-2'-deoxyuridine, scale  
736 bars represent 5  $\mu\text{m}$ .



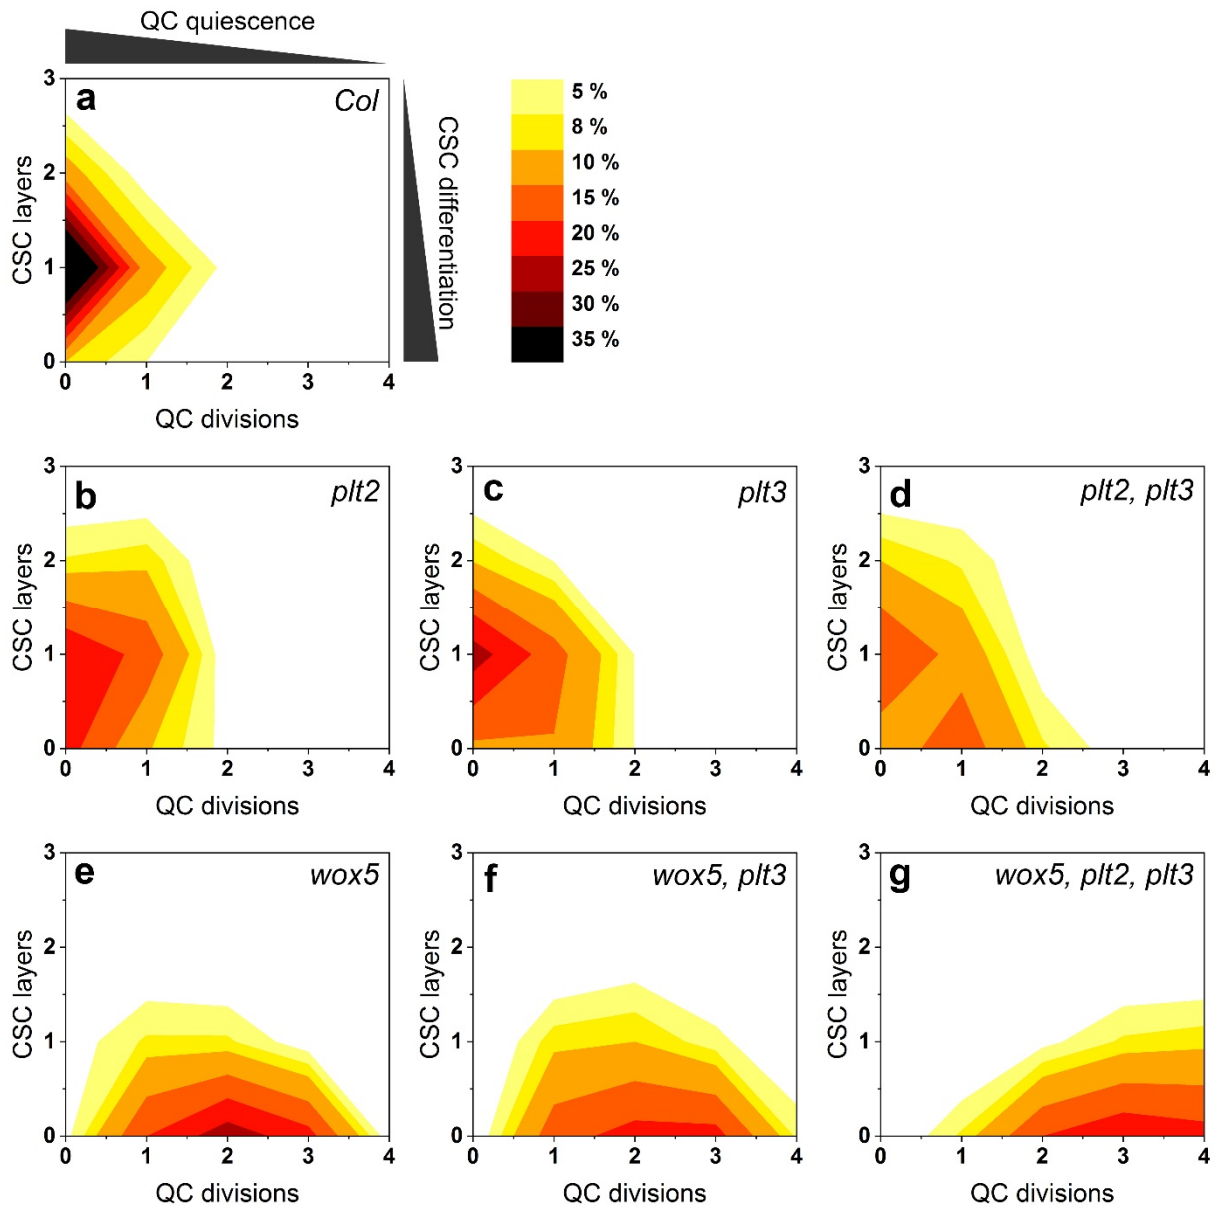

737 **Fig. 4 | QC divisions correlate negatively with the number of CSC layers.** The combined  
738 results of the SCN staining in Fig. 3 are shown as 2D plots to visualise the correlation of the  
739 CSC layer number and QC division. Number of CSC layers are shown on the y axis and the QC  
740 division phenotype is shown on the x axis. The darker the colour, the more roots show the  
741 respective phenotype (see colour gradient top right indicating the frequencies). *Col* wild type  
742 roots show one layer of CSCs and no EdU stained cells (no QC division) after 24 h EdU  
743 staining.

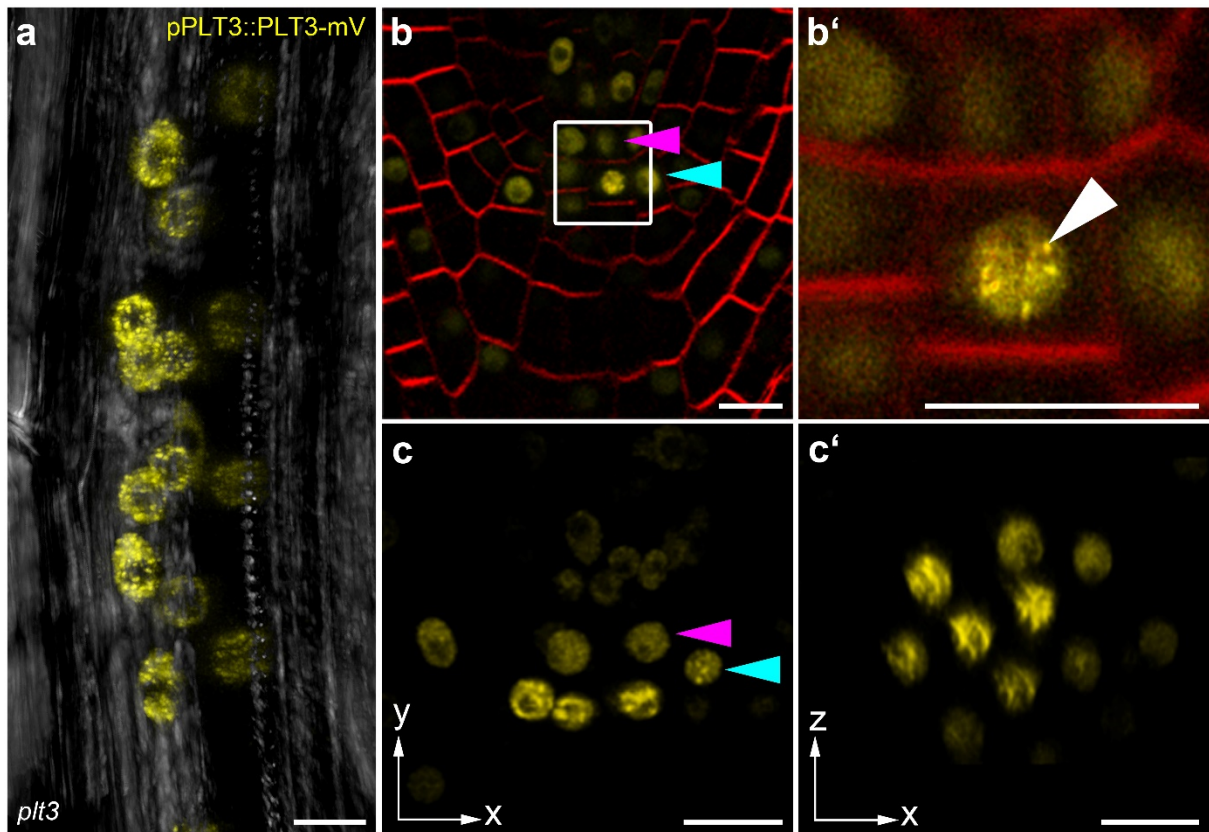

744 **Fig. 5 | PLT3 localises to NBs in *Arabidopsis thaliana* LRPs and CSCs. a-c'**, PLT3-mV  
745 expression driven by the PLT3 endogenous promoter in LRP (a) and main root SCN (b-c') in  
746 *plt3* mutant *Arabidopsis* roots. a, representative image of PLT3-mV expression (yellow) in an  
747 LRP showing the subnuclear localisation to NBs. Transmitted light image in grey. b,b', SCN  
748 of an PLT3-mV expressing FM4-64-stained (red) *Arabidopsis* main root. The magnification of  
749 the CSC layer (b') shows the subnuclear localisation of PLT3 to NBs in a CSC. White  
750 arrowhead points at a NB. c,c', SCN of an PLT3-mV expressing *Arabidopsis* main root. NBs  
751 are visible in the CSC layer in c, also in the transversal view of the CSC layer (c'). Arrowheads  
752 in b and c point at the QC (magenta) and CSC (cyan) positions. mV = mVenus; LRP = lateral  
753 root primordium; SCN = stem cell niche; NBs = nuclear bodies; CSC = columella stem cell.  
754 Scale bars represent 10 µm.

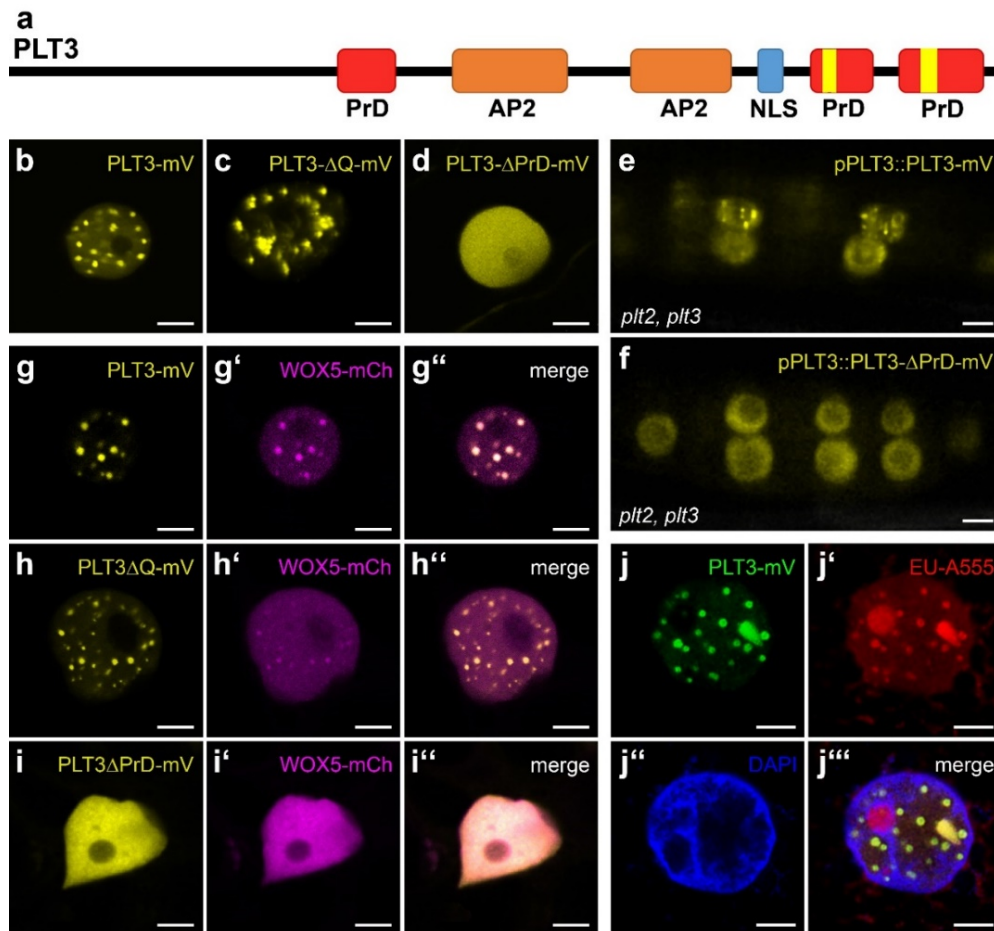

755 **Fig. 6 | PLT3 PrD domains influence its subnuclear localisation.** a, schematic representation  
 756 of PLT3 protein domains. The areas in red are predicted prion-like domains (PrDs) and were  
 757 deleted in PLT3- $\Delta$ PrD-mV. The areas highlighted in yellow contain polyQ-stretches and were  
 758 deleted in PLT3- $\Delta$ Q-mV. b-d Expression of PLT3-mV (b), PLT3- $\Delta$ Q-mV (c) and PLT3- $\Delta$ PrD-  
 759 mV (d) in transiently expressing *N. benthamiana* leaf epidermal cells. e,f, PLT3-mV (e) and  
 760 PLT3- $\Delta$ PrD-mV (f) expression driven by the PLT3 endogenous promoter in lateral root  
 761 primordia of *plt2, plt3* double mutant *Arabidopsis* roots. g-i'', Co-expression of PLT3-mV (g),  
 762 PLT $\Delta$ Q-mV (h) and PLT3 $\Delta$ PrD-mV (i) with WOX5-mCh (g',h',i') in transiently expressing  
 763 *N. benthamiana* leaf epidermal cells. j-j''', Expression of PLT3-mV (j) in transiently  
 764 expressing *N. benthamiana* leaf epidermal cells in combination with RNA staining with EU (18  
 765 h), visualised by click-reaction with Alexa Fluor® 555 (j') and a DNA staining with DAPI (j'').  
 766 mV = mVenus; PrD = prion-like domain; AP2 = APETALA2 domain; NLS = nuclear  
 767 localisation signal; EU = 5-ethynyl-2'-uridine. Scale bars in (b-j''') represent 5  $\mu$ m.

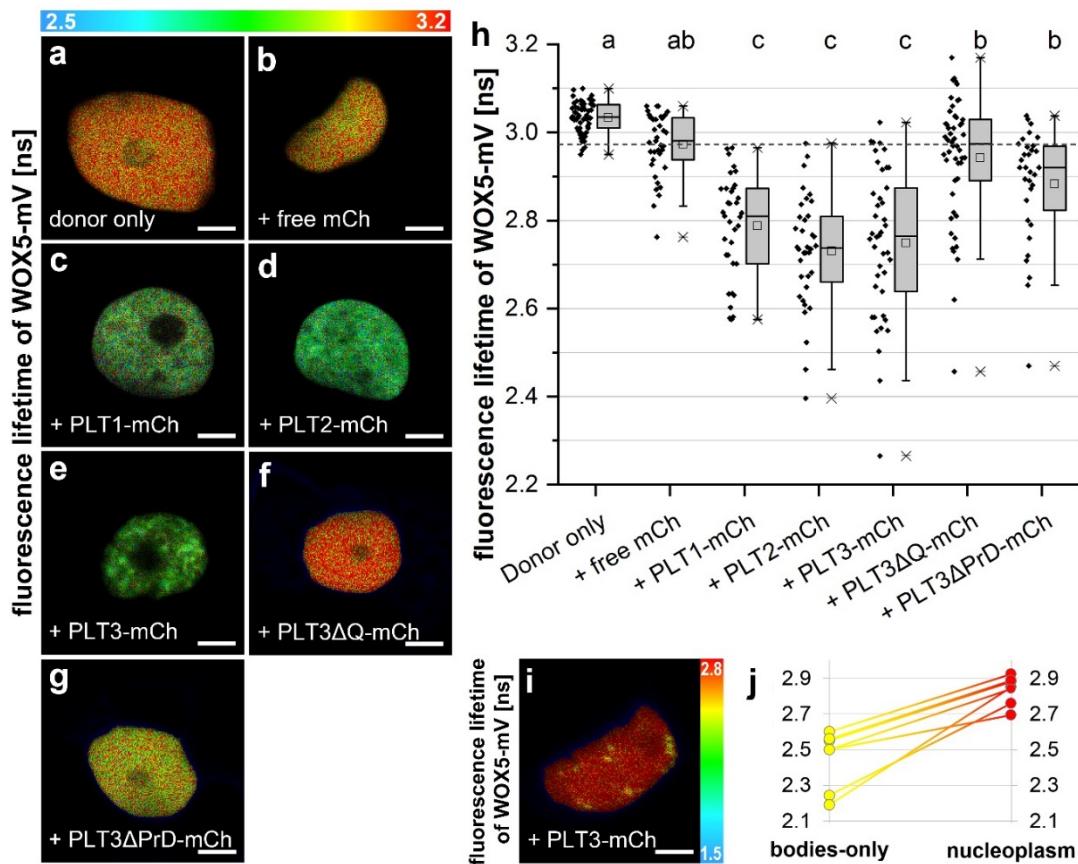

768 **Fig. 7 | WOX5 can interact with PLTs.** **a-h**, Fluorescence Lifetime Imaging (FLIM) results  
 769 of transiently expressing *N. benthamiana* leaf epidermal cells. **a-g,i** FLIM images of WOX5-  
 770 mVenus (donor only) plus the indicated acceptors after a pixel-wise mono-exponential fit of  
 771 the mVenus fluorescence signal. The fluorescence lifetime of WOX5-mVenus in ns is color-  
 772 coded. Low lifetimes (blue) due to FRET indicate strong interaction of the two proteins and  
 773 high lifetimes (red) indicate weaker or no interaction. Scale bars represent 5  $\mu$ m. **h**,  
 774 Fluorescence lifetimes in ns are summarized in combined scatter and box plots. Statistical  
 775 analysis of samples was carried out by one-way ANOVA and post-hoc multiple comparisons  
 776 using the Holm-Sidak test. Samples with identical letters do not show significant differences  
 777 ( $\alpha = 0.01$ ;  $n \geq 32$ ). Box = 25-75 % of percentile, whisker = 1.5 interquartile range, – = median,  
 778  $\square$  = mean value,  $\times$  = minimum/maximum. **j**, 7 individual nuclei showing nuclear bodies during  
 779 co-expression of WOX5-mV and PLT3-mCh were analysed for WOX5-mV lifetime in the  
 780 nuclear bodies or nucleoplasm separately. mCh = mCherry. mV = mVenus.

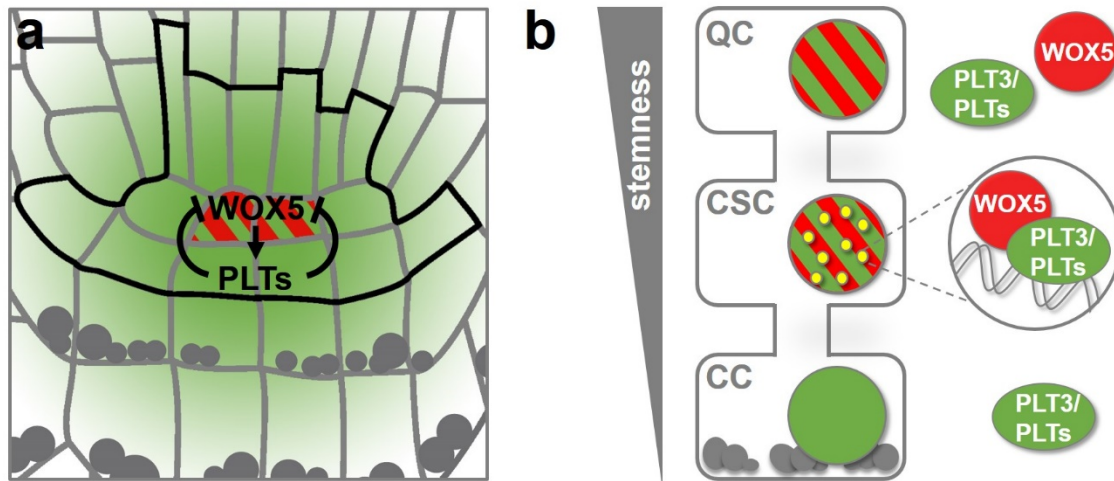

781 **Fig. 8 | Model of PLT and WOX5 transcriptional regulation, interaction and subnuclear**  
782 **localisation during distal root stem cell maintenance.**

783 **a**, Transcriptional regulation of *WOX5* (red) and *PLT* (green) expression by negative feedback  
784 regulation in the *Arabidopsis* RAM. *WOX5* is expressed in the QC and promotes *PLT*  
785 expression, whereas *PLT* expression is restricting the *WOX5* expression domain to the QC  
786 position. **b**, Both *WOX5* (red) and *PLT3* (green) are present homogenously within the nuclei  
787 of the QC cells. *WOX5* can move to the CSCs and is recruited there by *PLT3* to NBs (yellow),  
788 where interaction takes place. This maintains the stem cell character of the CSCs but already  
789 leads to a determination to subsequent CC fate.
