# Supplementary material for: PLETHORA-WOX5 interaction and subnuclear localisation control Arabidopsis root stem cell maintenance
Source: bioRxiv or medRxiv preprint supplement (doi:10.1101/818187), 2021-10-01
Supplement: Supplementary file [file media-2.pdf]

**Supplementary Table 1: List of cloning primers**

| cloning system      | gene ID                 | alias    | primer name                 | orientation                     | sequence                                        |
|---------------------|-------------------------|----------|-----------------------------|---------------------------------|-------------------------------------------------|
| GreenGate           | <b>Promoter modules</b> |          |                             |                                 |                                                 |
|                     | AT3G11260               | pWOX5    | RD_GreenGate pWOX5 F        | F                               | AAAGGTCTCAACCTAAAGACTTTTATCTACCA<br>ACTTCAAAAAG |
|                     |                         |          | RD_GreenGate pWOX5 R        | R                               | AAAGGTCTCATGTTTCGTTTCAGATGTAAAG                 |
|                     |                         |          | RD_GG pWOX5 BsaI a v2 F     | F                               | AGAGACCAAATTATTTTGGTTATATGGTAG                  |
|                     |                         |          | RD_GG pWOX5 BsaI a v2 R     | R                               | CTACCATATAACCAAATAATTTGGTCTCT                   |
|                     |                         |          | RD_GreenGate pWOX5 BsaI b F | F                               | ATTACGATGTGAGAGCGCCTTCAACTTT                    |
|                     |                         |          | RD_GreenGate pWOX5 BsaI b R | R                               | AAAGTTGAAGGCGCTCTCACATCGTAAT                    |
|                     | AT5G10510               | pPLT3    | RD_GG pPLT3 F V2            | F                               | AAAGGTCTCAACCTAATTTAACGTATTCTTTC                |
|                     |                         |          | RD_GG pPLT3 R V2            | R                               | AAAGGTCTCATGTTAACTTTCTTATAAAAAC<br>AATT         |
|                     | <b>CDS modules</b>      |          |                             |                                 |                                                 |
|                     | AT3G11260               | WOX5     | RD_GreenGate WOX5 F         | F                               | AAAGGTCTCAGGCTTAATGTCTTTCTCCGTG                 |
|                     |                         |          | RD_GreenGate WOX5 Mitte R   | R                               | GACGTCGTGGTGGTTTCTCGAATATATT                    |
|                     |                         |          | RD_GreenGate WOX5 Mitte F   | F                               | AATATATTCGAGAAACCACCACGACGTC                    |
|                     |                         |          | RD_GreenGate WOX5 R         | R                               | AAAGGTCTCACTGAAAAGAAAGCTTAATCG                  |
|                     | AT5G10510               | PLT3     | RD_GreenGate PLT3 F         | F                               | AAAGGTCTCAGGCTTAATGGAGATGTTGAG                  |
|                     |                         |          | RD_GreenGate PLT3 R         | R                               | AAAGGTCTCACTGAGTAAGACTGATTAGGC                  |
|                     |                         | PLT3ΔPrD | RD_GreenGate PLT3 F         | F                               | AAAGGTCTCAGGCTTAATGGAGATGTTGAG                  |
|                     |                         |          | RD_PLT3ΔPrD1 CDS1 R         | R                               | CCAGCTGCAACACCAAGTGACAAAG                       |
|                     |                         |          | RD_PLT3ΔPrD1 linker F       | F                               | CTTGGTGTTCAGCTGGTGCTG                           |
|                     |                         |          | RD_PLT3ΔPrD1 linker R       | R                               | GTCTTCTCTGCTCCTGCGGCAG                          |
| RD_PLT3ΔPrD1 CDS2 F |                         |          | F                           | CGCAGGAGCAGAGAAGACAGATTCTG      |                                                 |
| RD_GG PLT3ΔPrDs R   |                         |          | R                           | AAAGGTCTCACTGAGTGAAGTTGATGATGAC |                                                 |
| Gateway             | AT3G11260               | WOX5     | YS_WOX5 F CACC              | F                               | CACCATGTCTTTCTCCGTGAAAGGTCGAAGCTT<br>ACG        |
|                     |                         |          | YS_WOX5 R -stop             | R                               | AAGAAAGCTTAATCGAAGATCTAATGGC                    |
|                     | AT3G20840               | PLT1     | YS_PLT1 F CACC              | F                               | CACCATGAATTCTAACAACCTGGCTTGGCT                  |
|                     |                         |          | YS_PLT1 r -stop             | R                               | CTCATTCCACATAGTGAAAACACCACCAGGG                 |
|                     | AT1G51190               | PLT2     | YS_PLT2 F CACC              | F                               | CACCATGAATTCTAACAACCTGGCTCGCGTTCCC<br>TCT       |
|                     |                         |          | YS_PLT2 R -stop             | R                               | TTCATTCCACATCGTGAAAACACCTCCT                    |
|                     | AT5G10510               | PLT3     | YS_PLT3 F CACC              | F                               | CACCATGGAGATGTTGAGGTCATCTGATCAGT<br>CTCA        |
|                     |                         |          | YS_PLT3 R -stop             | R                               | GTAAGACTGATTAGGCCAGAGGAAG                       |
|                     |                         | PLT3ΔQ   | YS_PLT3 F CACC              | F                               | CACCATGGAGATGTTGAGGTCATCTGATCAGT<br>CTCA        |
|                     |                         |          | RD_PLT3 Seg1 R              | R                               | GAGATGAGAAATGGTGAAGTTGATGATGAC                  |
|                     |                         |          | RD_PLT3 Seg2 F              | F                               | CTTCACCATTTCTCATCTCCTAATCACAGTAGC               |
|                     |                         |          | RD_PLT3 Seg2 R              | R                               | GAAGAAGTTGTGGTGGTAAAGAGCAG                      |
|                     |                         |          | RD_PLT3 Seg3 F              | F                               | CACCACCACAACCTTCTCCAGCATTTTCC                   |
|                     |                         |          | YS_PLT3 R -stop             | R                               | GTAAGACTGATTAGGCCAGAGGAAG                       |

**Supplementary Table 2: List of genotyping primers**

| gene ID   | alias         | primer name                 | orientation | sequence                        |
|-----------|---------------|-----------------------------|-------------|---------------------------------|
| AT3G11260 | <i>wox5-1</i> | GK_WOX5 F                   | F           | AAACAGTTGAGGACTTTACATCTGA       |
|           |               | WOX5 R                      | R           | CGGATAATATGTCATAATTCAAAT        |
| AT5G10510 | <i>plt3-1</i> | GK_PLT3L                    | F           | TTGTGATTGCCATTGACTAAAGGT        |
|           |               | GK_PLT3R                    | R           | GAAAACAGTCCAATGGTCTCACATC       |
| AT1G51190 | <i>plt2</i>   | RD_plt2<br>SALK128164 neu L | F           | GCTTAAATAGATATATGGTCATGCTTATATC |
|           |               | RD_plt2<br>SALK128164 neu R | R           | CAAGAAGACTCCAGCCGATC            |
|           |               | SALK LBB1V2                 |             | AAACCAGCGTGGACCGCTTGCTGCAACTCT  |

**Supplementary Table 3: List of expression vectors used in this study**

| cloning system | constructs                                      | promoter          | N-tag               | CDS       | C-tag                | terminator       | plant sel. marker | destination Vector | bacterial sel. marker | plasmid ID |       |
|----------------|-------------------------------------------------|-------------------|---------------------|-----------|----------------------|------------------|-------------------|--------------------|-----------------------|------------|-------|
|                |                                                 | module A          | module B            | module C  | module D             | module E         | module F          | module Z           |                       |            |       |
| GreenGate      | <b>pWOX5::mVenus-NLS</b>                        | WOX5 promoter     | Ω-element (pGGB002) | mVenus    | linker-NLS (pGGD007) | tUBQ10 (pGGE009) | BASTA (pGGF002)   | pGGZ001            | Spec                  | pVS10      |       |
|                | <b>pWOX5::WOX5-mV</b>                           | WOX5 promoter     | Ω-element (pGGB002) | WOX5      | mVenus               | tUBQ10 (pGGE009) | Hyg (pGGF005)     | pGGZ001            | Spec                  | pRD48      |       |
|                | <b>pPLT3::PLT3-mV</b>                           | PLT3 promoter     | Ω-element (pGGB002) | PLT3      | mVenus               | tUBQ10 (pGGE009) | Hyg (pGGF005)     | pGGZ001            | Spec                  | pRD73      |       |
|                | <b>pPLT3::PLT3-mCh</b>                          | PLT3 promoter     | Ω-element (pGGB002) | PLT3      | mCherry              | tUBQ10 (pGGE009) | -                 | pGGM000            | Kan                   | pRD83      |       |
|                | <b>pWOX5::WOX5-mV</b>                           | WOX5 promoter     | Ω-element (pGGB002) | WOX5      | mVenus               | tUBQ10 (pGGE009) | Hyg (pGGF005)     | pGGN000            | Kan                   | pRD84      |       |
|                | <b>pPLT3::PLT3-mCh</b><br><b>pWOX5::WOX5-mV</b> | pRD83 + pRD84     |                     |           |                      |                  |                   |                    | pGGZ001               | Spec       | pRD89 |
|                | <b>pPLT3::PLT3ΔPrD-mV</b>                       | PLT3 promoter     | Ω-element (pGGB002) | PLT3 ΔPrD | mVenus               | tUBQ10 (pGGE009) | Hyg (pGGF005)     | pGGZ001            | Spec                  | pRD125     |       |
|                | <b>inducible PLT3ΔPrD-mV</b>                    | Ubi-XVE oLexA-35S | Ω-element (pGGB002) | PLT3 ΔPrD | mVenus               | tUBQ10 (pGGE009) | Hyg (pGGF005)     | pGGZ001            | Spec                  | pRD106     |       |
|                | <b>inducible PLT3ΔPrD-mCh</b>                   | Ubi-XVE oLexA-35S | Ω-element (pGGB002) | PLT3 ΔPrD | mCherry              | tUBQ10 (pGGE009) | Hyg (pGGF005)     | pGGZ001            | Spec                  | pRD138     |       |
| Gateway        | <b>inducible WOX5-mV</b>                        | Ubi-XVE oLexA-35S | -                   | WOX5      | mVenus               | T3A              | Hyg               | pRD04              | Spec                  | pRD26      |       |
|                | <b>inducible WOX5-mCh</b>                       | Ubi-XVE oLexA-35S | -                   | WOX5      | mCherry              | T3A              | Hyg               | pABind mCherry     | Spec                  | pFB02      |       |
|                | <b>inducible PLT1-mCh</b>                       | Ubi-XVE oLexA-35S | -                   | PLT1      | mCherry              | T3A              | Hyg               | pABind mCherry     | Spec                  | pRD144     |       |
|                | <b>inducible PLT2-mCh</b>                       | Ubi-XVE oLexA-35S | -                   | PLT2      | mCherry              | T3A              | Hyg               | pABind mCherry     | Spec                  | pRD147     |       |
|                | <b>inducible PLT3-mV</b>                        | Ubi-XVE oLexA-35S | -                   | PLT3      | mVenus               | T3A              | Hyg               | pRD04              | Spec                  | pRD25      |       |
|                | <b>inducible PLT3-mCh</b>                       | Ubi-XVE oLexA-35S | -                   | PLT3      | mCherry              | T3A              | Hyg               | pABind mCherry     | Spec                  | pFB06      |       |
|                | <b>inducible PLT3ΔQ-mV</b>                      | Ubi-XVE oLexA-35S | -                   | PLT3 ΔQ   | mVenus               | T3A              | Hyg               | pRD04              | Spec                  | pRD57      |       |
|                | <b>inducible PLT3ΔQ-mCh</b>                     | Ubi-XVE oLexA-35S | -                   | PLT3 ΔQ   | mCherry              | T3A              | Hyg               | pABind mCherry     | Spec                  | pRD81      |       |
|                | <b>inducible free mCherry</b>                   | Ubi-XVE oLexA-35S | -                   | mCherry   | -                    | T3A              | Hyg               | pMDC7              | Spec                  | -          |       |

**Supplementary Table 4: *Arabidopsis* mutants and transgenic lines**

| <b>gene ID</b>                        | <b>alias</b>                                 | <b>reference</b>                                                           |
|---------------------------------------|----------------------------------------------|----------------------------------------------------------------------------|
| AT3G11260                             | <i>wox5-1</i>                                | SALK038262 (ABRC)                                                          |
| AT5G10510                             | <i>plt3-1</i>                                | Galinha <i>et al.</i> (2007)                                               |
| AT1G51190                             | <i>plt2</i>                                  | SALK_128164 (ABRC)                                                         |
| AT1G51190,<br>AT5G10510               | <i>plt2, plt3</i>                            | this study, crossing of <i>plt2</i> and <i>plt3-1</i>                      |
| AT3G11260,<br>AT5G10510               | <i>wox5, plt3</i>                            | this study, crossing of <i>wox5-1</i> and <i>plt3-1</i>                    |
| AT3G11260,<br>AT1G51190,<br>AT5G10510 | <i>wox5, plt2, plt3</i>                      | this study, crossing of <i>plt2, plt3</i> and <i>wox5, plt3</i>            |
| AT5G10510                             | pPLT3::erCFP ( <i>Col-0</i> )                | Galinha <i>et al.</i> (2007)                                               |
| AT5G10510                             | pPLT3::erCFP ( <i>wox5-1</i> )               | this study, crossing of pPLT3::erCFP ( <i>Col-0</i> ) and <i>wox5-1</i>    |
| AT5G10510                             | pPLT3::PLT3-YFP ( <i>Col-0</i> )             | Galinha <i>et al.</i> (2007)                                               |
| AT5G10510                             | pPLT3:: PLT3-YFP ( <i>wox5-1</i> )           | this study, crossing of pPLT3::PLT3-YFP ( <i>Col-0</i> ) and <i>wox5-1</i> |
| AT5G10510                             | pPLT3::PLT3-mVenus ( <i>plt2, plt3</i> )     | this study                                                                 |
| AT5G10510                             | pPLT3::PLT3ΔPrD-mVenus ( <i>plt2, plt3</i> ) | this study                                                                 |
| AT3G11260                             | pWOX5::mVenus-NLS ( <i>Col-0</i> )           | this study                                                                 |
| AT3G11260                             | pWOX5::mVenus-NLS ( <i>plt2</i> )            | this study                                                                 |
| AT3G11260                             | pWOX5::mVenus-NLS ( <i>plt3-1</i> )          | this study                                                                 |
| AT3G11260                             | pWOX5::mVenus-NLS ( <i>plt2, plt3</i> )      | this study                                                                 |

**Supplementary Table 5: Intensity values of transcriptional and translational FP tagged PLT3 expression experiments in *Col-0* and *wox5* related to Fig. 1.**

| root #          | pPLT3::erCFP fluorescence intensity [%] |              | pPLT3::PLT3-YFP fluorescence intensity [%] |              |
|-----------------|-----------------------------------------|--------------|--------------------------------------------|--------------|
|                 | <i>Col-0</i>                            | <i>wox5</i>  | <i>Col-0</i>                               | <i>wox5</i>  |
| <b>1</b>        | 84                                      | 65           | 96                                         | 69           |
| <b>2</b>        | 108                                     | 67           | 121                                        | 31           |
| <b>3</b>        | 81                                      | 78           | 73                                         | 72           |
| <b>4</b>        | 93                                      | 48           | 68                                         | 64           |
| <b>5</b>        | 101                                     | 46           | 68                                         | 38           |
| <b>6</b>        | 95                                      | 65           | 95                                         | 109          |
| <b>7</b>        | 113                                     | 52           | 109                                        | 75           |
| <b>8</b>        | 128                                     | 53           | 72                                         | 39           |
| <b>9</b>        | 82                                      | 58           | 78                                         | 79           |
| <b>10</b>       | 71                                      |              | 127                                        | 30           |
| <b>11</b>       | 105                                     |              | 164                                        | 63           |
| <b>12</b>       | 139                                     |              | 84                                         | 39           |
| <b>13</b>       |                                         |              | 145                                        | 66           |
| <b>14</b>       |                                         |              |                                            | 55           |
| <b>15</b>       |                                         |              |                                            | 56           |
| <b>16</b>       |                                         |              |                                            | 99           |
| <b>mean</b>     | <b>100</b>                              | <b>59</b>    | <b>100</b>                                 | <b>62</b>    |
| <b>st. dev.</b> | <b>20.10</b>                            | <b>10.39</b> | <b>31.13</b>                               | <b>23.01</b> |

**Supplementary Table 6: Quantification of transcriptional mVenus tagged WOX5 expression in the QC region of *Col* and *plt2*, *plt3* related to Fig. 2.**

| root #          | number of cells with WOX5 expression |                           | lateral area of WOX5 expression in the root tip [ $\mu\text{m}^2$ ] |                           |
|-----------------|--------------------------------------|---------------------------|---------------------------------------------------------------------|---------------------------|
|                 | <i>Col</i>                           | <i>plt2</i> , <i>plt3</i> | <i>Col</i>                                                          | <i>plt2</i> , <i>plt3</i> |
| <b>1</b>        | 7                                    | 14                        | 432.03                                                              | 719.28                    |
| <b>2</b>        | 4                                    | 9                         | 345.88                                                              | 886.24                    |
| <b>3</b>        | 7                                    | 13                        | 393.67                                                              | 861.28                    |
| <b>4</b>        | 7                                    | 13                        | 400.62                                                              | 882.48                    |
| <b>5</b>        | 8                                    | 12                        | 346.86                                                              | 548.73                    |
| <b>6</b>        | 6                                    | 11                        | 430.11                                                              | 736.44                    |
| <b>7</b>        | 8                                    | 14                        | 467.05                                                              | 793.77                    |
| <b>8</b>        | 6                                    | 12                        | 512.33                                                              | 693.18                    |
| <b>9</b>        | 7                                    | 13                        | 444.99                                                              | 948.22                    |
| <b>10</b>       | 9                                    | 14                        | 474.60                                                              | 747.27                    |
| <b>mean</b>     | <b>6.90</b>                          | <b>12.50</b>              | <b>424.81</b>                                                       | <b>781.69</b>             |
| <b>st. dev.</b> | <b>1.30</b>                          | <b>1.50</b>               | <b>51.26</b>                                                        | <b>111.59</b>             |

**Supplementary Table 7: Average QC and CSC phenotypes related to Fig. 3.**

| <b>Genotype</b>         | <b>average QC cell-divisions per root (<math>\pm</math> st. dev.)</b> | <b>average CSC layers per root (<math>\pm</math> st. dev.)</b> | <b>number of analyzed roots</b> |
|-------------------------|-----------------------------------------------------------------------|----------------------------------------------------------------|---------------------------------|
| <i>Col</i>              | $0.34 \pm 0.59$                                                       | $0.99 \pm 0.59$                                                | 146                             |
| <i>plt2</i>             | $0.53 \pm 0.64$                                                       | $0.82 \pm 0.72$                                                | 77                              |
| <i>plt3</i>             | $0.61 \pm 0.64$                                                       | $0.85 \pm 0.69$                                                | 121                             |
| <i>plt2, plt3</i>       | $0.81 \pm 0.88$                                                       | $0.84 \pm 0.82$                                                | 105                             |
| <i>wox5</i>             | $1.87 \pm 0.98$                                                       | $0.23 \pm 0.44$                                                | 118                             |
| <i>wox5, plt3</i>       | $2.11 \pm 0.98$                                                       | $0.31 \pm 0.51$                                                | 87                              |
| <i>wox5, plt2, plt3</i> | $2.83 \pm 1.05$                                                       | $0.24 \pm 0.46$                                                | 98                              |

**Supplementary Table 8: Percentage of periclinal cell divisions in the QC shown in Supplementary Fig. 2.**

| <b>Genotype</b>         | <b>periclinal QC cell divisions [%]</b> | <b>number of analyzed roots</b> |
|-------------------------|-----------------------------------------|---------------------------------|
| <i>Col</i>              | 3                                       | 146                             |
| <i>plt2</i>             | 21                                      | 77                              |
| <i>plt3</i>             | 21                                      | 121                             |
| <i>plt2, plt3</i>       | 53                                      | 105                             |
| <i>wox5</i>             | 41                                      | 118                             |
| <i>wox5, plt3</i>       | 43                                      | 87                              |
| <i>wox5, plt2, plt3</i> | 53                                      | 98                              |



**Supplementary Table 9: Average QC and CSC phenotypes of rescue experiments**

| <b>Genotype</b>                         | <b>average QC cell-divisions per root (<math>\pm</math> SD)</b> | <b>average CSC layers per root (<math>\pm</math> SD)</b> | <b>number of analyzed roots</b> |
|-----------------------------------------|-----------------------------------------------------------------|----------------------------------------------------------|---------------------------------|
| rescue experiment of <i>wox5</i> mutant |                                                                 |                                                          |                                 |
| <i>Col</i>                              | 0.33 $\pm$ 0.61                                                 | 0.83 $\pm$ 0.59                                          | 30                              |
| <i>wox5</i>                             | 1.77 $\pm$ 1.14                                                 | 0.33 $\pm$ 0.55                                          | 30                              |
| <i>wox5</i><br><i>pWOX5::WOX5-mV</i>    | 0.43 $\pm$ 0.67                                                 | 0.88 $\pm$ 0.65                                          | 51                              |
| rescue experiment of <i>plt3</i> mutant |                                                                 |                                                          |                                 |
| <i>Col</i>                              | 0.46 $\pm$ 0.65                                                 | 1.00 $\pm$ 0.40                                          | 26                              |
| <i>plt3</i>                             | 1.60 $\pm$ 1.14                                                 | 0.85 $\pm$ 0.59                                          | 20                              |
| <i>plt3</i><br><i>pPLT3::PLT3-mV</i>    | 0.81 $\pm$ 0.87                                                 | 0.87 $\pm$ 0.43                                          | 31                              |

**Supplementary Table 10: FLIM results of subnuclear data analysis in WOX5-mV and PLT3-mCh co-expressing *N. benthamiana* epidermal cells related to Fig. 5.**

| date            | measurement #       | WOX5-mVenus fluorescence lifetime [ns] |             |
|-----------------|---------------------|----------------------------------------|-------------|
|                 |                     | bodies-only                            | nucleoplasm |
| 2019-06-11      | WOX5-mV PLT3-mCh_7  | 2.24                                   | 2.76        |
|                 | WOX5-mV PLT3-mCh_15 | 2.19                                   | 2.85        |
| 2019-06-10      | WOX5-mV PLT3-mCh_23 | 2.60                                   | 2.92        |
|                 | WOX5-mV PLT3-mCh_25 | 2.55                                   | 2.88        |
| 2018-06-29      | WOX5-mV PLT3-mCh_4  | 2.56                                   | 2.89        |
| 2018-06-28      | WOX5-mV PLT3-mCh_1  | 2.50                                   | 2.84        |
|                 | WOX5-mV PLT3-mCh_9  | 2.50                                   | 2.69        |
| <b>mean</b>     |                     | <b>2.45</b>                            | <b>2.83</b> |
| <b>st. dev.</b> |                     | <b>0.15</b>                            | <b>0.07</b> |
